# Supplementary material for: A general access to 1,1-cyclopropane aminoketones and their conversion into 2-benzoyl quinolines
Source: Royal Society of Chemistry journal article supplement (doi:10.1039/c2cc35235d), 2012-01-01

# A general access to 1,1-cyclopropane aminoketones and their conversion into 2-benzoyl quinolines

Zhenjun Mao, Haijun Qu, Yanyan Zhao, Xufeng Lin\*

*Department of Chemistry, Zhejiang University, Hangzhou 310027, P. R. China*

E-mail: lxfok@zju.edu.cn

## Supporting Information

### Contents

|                                                                                        |     |
|----------------------------------------------------------------------------------------|-----|
| General Considerations .....                                                           | S2  |
| General Procedure for the Synthesis of <b>3</b> , <b>4</b> , <b>5</b> , <b>6</b> ..... | S2  |
| Characterization Data .....                                                            | S4  |
| References.....                                                                        | S15 |
| <sup>1</sup> H NMR and <sup>13</sup> C NMR spectra.....                                | S16 |

## General Considerations

IR spectra were recorded on a ATR spectrometer (neat) and reported in reciprocal centimeters ( $\text{cm}^{-1}$ ). NMR spectra were recorded for  $^1\text{H}$  NMR at 400 MHz or 500 MHz and for  $^{13}\text{C}$  NMR at 100 MHz or 125 MHz. For  $^1\text{H}$  NMR, tetramethylsilane (TMS) served as internal standard ( $\delta = 0$ ) and data are reported as follows: chemical shift, integration, multiplicity (s = singlet, d = doublet, t = triplet, q = quartet, m = multiplet, br = broad), and coupling constant in Hz. For  $^{13}\text{C}$  NMR,  $\text{CDCl}_3$  ( $\delta = 77.00$ ) was used as internal standard and spectra were obtained with complete proton decoupling. HRMS data were obtained using EI ionization. Mp data were measured with micro melting point apparatus. Elemental Analyses were recorded on an automatic analyzer. All starting materials **1a-1m**<sup>1</sup> were prepared according to the methods reported in the literature, vinylsulfonium salt **2a**<sup>2</sup> and styryl sulfonium salt **2b**<sup>3</sup> were prepared according to the methods reported in the literature.

## General procedure for the synthesis of **3** or **4**

A stirred solution of  $\beta$ -amino ketone (1.0 mmol) in  $\text{CH}_2\text{Cl}_2$  (2 mL) was treated with DBU (2.0 mmol) at 0 °C under nitrogen. After 5 min, a solution of vinyl sulfonium salts (1.2 mmol) in  $\text{CH}_2\text{Cl}_2$  (5 mL) was added drop-wise over 5 min, and the reaction was stirred for 1 h at 0 °C. The reaction was then quenched with saturated ammonium chloride solution (10 mL), extracted with  $\text{CH}_2\text{Cl}_2$  ( $3 \times 10$  mL), washed with brine (20 mL), dried over  $\text{Na}_2\text{SO}_4$ . The filtrate was concentrated in vacuum, the residue was subject to a flash chromatography on silica gel with petroleum ether/ethyl acetate (8:1) as eluent to afford the corresponding product **3** or **4**.

## General Procedure for the Synthesis of **5**

To a solution of **3** (0.5 mmol) in toluene (2 mL) was added DEAD (1.0 mmol) and the resulting mixture was heated under 80 °C for 8 h. After removal of the solvent in vacuum, the residue was subject to a flash chromatography on silica gel with petroleum ether/ethyl acetate (20:1) as eluent to afford the corresponding product **5**.

## General Procedure for the Synthesis of **3aa**

To a solution of **3a** (1.0 mmol) in methanol (2 mL) was added Sodium borohydride (2.0 mmol) under 0 °C, and the resulting mixture was heated at 50 °C for 2 h. The reaction mixture was allowed to cool to room temperature, then quenched with water (5 mL), extracted with CH<sub>2</sub>Cl<sub>2</sub> (3 × 10 mL), washed with brine (20 mL), dried over Na<sub>2</sub>SO<sub>4</sub>, the residue was subject to a flash chromatography on silica gel with petroleum ether/ethyl acetate (6:1) as eluent to afford the corresponding product **3aa** in 95% yield.

### General Procedure for the Synthesis of **6**

A stirred solution of **3aa** (1.0 mmol) in CH<sub>2</sub>Cl<sub>2</sub> (2 mL) was treated with NaH (3.0 mmol) at 0 °C under nitrogen, a solution of vinyl sulfonium salt **2a** (5.0 mmol) in CH<sub>2</sub>Cl<sub>2</sub> (5 mL) was added drop-wise over five min, the reaction was stirred for 1 h at 0 °C and at room temperature for 12 h. The reaction was then quenched with saturated ammonium chloride solution (10 mL), extracted with CH<sub>2</sub>Cl<sub>2</sub> (3 × 10 mL), washed with brine (20 mL), dried over Na<sub>2</sub>SO<sub>4</sub>. The filtrate was concentrated in vacuum, the residue was subject to a flash chromatography on silica gel with petroleum ether/ethyl acetate (50:1) as eluent to afford the corresponding product **6** as a mixture of two isomers (19: 6) in 84% yield.

## Characterization Data

### phenyl (1-(phenylamino)cyclopropyl)methanone (3a)

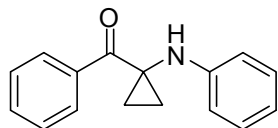

Light yellow solid, m.p.139–140 °C; IR (neat)  $\nu$  3394, 2921, 2851, 1660, 1602, 1512, 1446, 1317, 1202, 1025, 980, 748, 691  $\text{cm}^{-1}$ ;  $^1\text{H}$  NMR (400 MHz,  $\text{CDCl}_3$ )  $\delta$  7.79 – 7.77 (m, 2 H), 7.42 (t,  $J$  = 7.2 Hz, 1 H), 7.33 (t,  $J$  = 7.6 Hz, 2 H), 7.08 (t,  $J$  = 7.6 Hz, 2 H), 6.66 (t,  $J$  = 7.2 Hz, 1 H), 6.57 (d,  $J$  = 7.6 Hz, 2 H), 4.51 (s, 1 H), 1.78 – 1.75 (m, 2 H), 1.24 – 1.21 (m, 2 H) ppm;  $^{13}\text{C}$  NMR (100 MHz,  $\text{CDCl}_3$ )  $\delta$  203.92, 146.50, 137.55, 131.76, 129.08, 128.10, 127.91, 118.21, 113.06, 42.98, 18.93 ppm; HRMS (EI):  $m/z$  calcd for ( $\text{C}_{16}\text{H}_{15}\text{NO}$ ): 237.1154; found: 237.1156.

### (1-(4-methoxyphenylamino)cyclopropyl)(phenyl)methanone (3b)

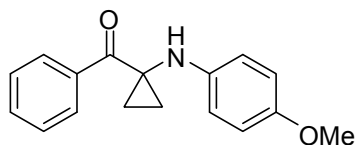

Yellow solid, m.p.119–120 °C; IR (neat)  $\nu$  3398, 2954, 2926, 1667, 1512, 1446, 1235, 1178, 1036, 971, 822, 714  $\text{cm}^{-1}$ ;  $^1\text{H}$  NMR (400 MHz,  $\text{CDCl}_3$ )  $\delta$  7.78 – 7.76 (m, 2 H), 7.41 (t,  $J$  = 7.2 Hz, 1 H), 7.32 (t,  $J$  = 7.6 Hz, 2 H), 6.68–6.65 (m, 2 H), 6.53–6.50 (m, 2 H), 4.33 (s, 1 H), 3.67 (s, 3 H), 1.73 – 1.70 (m, 2 H), 1.20 – 1.17 (m, 2 H) ppm;  $^{13}\text{C}$  NMR (100 MHz,  $\text{CDCl}_3$ )  $\delta$  204.23, 152.45, 140.57, 137.61, 131.71, 128.10, 127.85, 114.72, 114.09, 55.60, 43.50, 18.61 ppm; HRMS (EI):  $m/z$  calcd for ( $\text{C}_{17}\text{H}_{17}\text{NO}_2$ ): 267.1259 ; found: 267.1256.

### (1-(4-chlorophenylamino)cyclopropyl)(phenyl)methanone (3c)

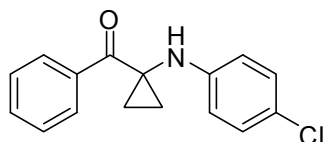

White solid, m.p.149–150 °C; IR (neat)  $\nu$  3398, 2961, 2924, 1667, 1593, 1488, 1307, 1247, 1087, 977, 813, 715, 688  $\text{cm}^{-1}$ ;  $^1\text{H}$  NMR (400 MHz,  $\text{CDCl}_3$ )  $\delta$  7.76 – 7.74 (m, 2 H), 7.44 (t,  $J$  = 7.2 Hz, 1 H), 7.35 (t,  $J$  = 7.6 Hz, 2 H), 7.03 – 7.00 (m, 2 H), 6.51 – 6.48 (m, 2 H), 4.55 (s, 1 H), 1.78 – 1.75 (m, 2 H), 1.24 – 1.20 (m, 2 H) ppm;  $^{13}\text{C}$  NMR (100 MHz,  $\text{CDCl}_3$ )  $\delta$  203.50, 145.08, 137.37,

131.93, 128.98, 128.22, 127.81, 122.96, 114.14, 43.05, 18.80 ppm; HRMS (EI):  $m/z$  calcd for ( $C_{16}H_{14}ClNO$ ): 271.0764 ; found: 271.0764.

**phenyl(1-(*o*-tolylamino)cyclopropyl)methanone (3d)**

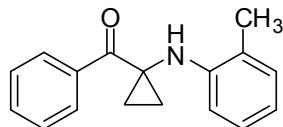

Light yellow solid, m.p.82–83 °C; IR (neat)  $\nu$  3419, 3056, 2928, 1682, 1599, 1503, 1441, 1298, 1197, 974, 751, 703  $cm^{-1}$ ;  $^1H$  NMR (400 MHz,  $CDCl_3$ )  $\delta$  7.80 – 7.78 (m, 2 H), 7.45 – 7.40 (m, 1 H), 7.36 – 7.32 (m, 2 H), 7.29 – 7.26 (m, 1 H), 7.09 – 7.05 (m, 1 H), 6.79 – 6.77 (m, 1 H), 6.54 – 6.50 (m, 1 H), 5.22 (s, 1 H), 1.83 – 1.80 (m, 2 H), 1.29 – 1.26 (m, 2 H) ppm;  $^{13}C$  NMR (100 MHz,  $CDCl_3$ )  $\delta$  204.26, 144.46, 137.36, 131.71, 129.95, 128.01, 127.66, 126.93, 121.31, 117.79, 111.13, 42.85, 18.68, 17.22 ppm; HRMS (EI):  $m/z$  calcd for ( $C_{17}H_{17}NO$ ): 251.1310; found: 251.1310.

**(1-(2-bromophenylamino)cyclopropyl)(phenyl)methanone (3e)**

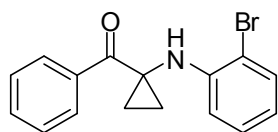

White solid, m.p.79–80 °C; IR (neat)  $\nu$  3395, 2959, 2924, 1673, 1596, 1503, 1456, 1316, 1201, 1021, 978, 744, 715  $cm^{-1}$ ;  $^1H$  NMR (400 MHz,  $CDCl_3$ )  $\delta$  7.86 (d,  $J$  = 7.6 Hz, 2 H), 7.57 (t,  $J$  = 7.6 Hz, 1 H), 7.44 (t,  $J$  = 7.6 Hz, 2 H), 7.27 – 7.24 (m, 3 H), 7.13 – 7.11 (m, 2 H), 7.02 (d,  $J$  = 8.4 Hz, 2 H), 6.92 (s, 1 H), 3.95 (q,  $J$  = 7.2 Hz, 2 H), 0.88 (t,  $J$  = 7.2 Hz, 3 H) ppm;  $^{13}C$  NMR (100 MHz,  $CDCl_3$ )  $\delta$  203.20, 143.89, 136.89, 132.21, 132.02, 128.31, 128.12, 127.89, 118.85, 112.60, 109.00, 42.84, 18.95 ppm; HRMS (EI):  $m/z$  calcd for ( $C_{16}H_{14}BrNO$ ):315.0259; found: 315.0257.

**(1-(3-methoxyphenylamino)cyclopropyl)(phenyl)methanone (3f)**

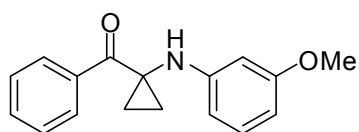

White solid, m.p.95–96 °C; IR (neat)  $\nu$  3399, 2958, 2926, 1667, 1614, 1494, 1446, 1279, 1205, 1159, 1050, 978, 834, 714, 689  $cm^{-1}$ ;  $^1H$  NMR (400 MHz,  $CDCl_3$ )  $\delta$  7.79 – 7.77 (m, 2 H), 7.43 –

7.40 (m, 1 H), 7.35 – 7.31 (m, 2 H), 6.98 (t,  $J = 8.0$  Hz, 1 H), 6.22 (dd,  $J_1 = 2.0$  Hz,  $J_2 = 8.0$  Hz, 1 H), 6.18 (dd,  $J_1 = 1.6$  Hz,  $J_2 = 8.0$  Hz, 1 H), 6.18 – 6.14 (m, 1 H), 4.59 (s, 1 H), 3.68 (s, 3 H), 1.77 – 1.74 (m, 2 H), 1.23 – 1.20 (m, 2 H) ppm;  $^{13}\text{C}$  NMR (100 MHz,  $\text{CDCl}_3$ )  $\delta$  203.84, 160.51, 147.91, 137.42, 131.79, 129.86, 128.10, 127.92, 105.99, 103.33, 99.05, 54.93, 42.91, 18.98 ppm; HRMS (EI):  $m/z$  calcd for ( $\text{C}_{17}\text{H}_{17}\text{NO}_2$ ): 267.1259; found: 267.1260.

**1-(3-chlorophenylamino)cyclopropyl(phenyl)methanone (3g)**

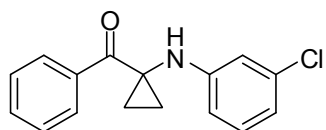

White solid, m.p. 105–106 °C; IR (neat)  $\nu$  3390, 3063, 2925, 1667, 1599, 1483, 1334, 1202, 1075, 979, 884, 767, 718, 685  $\text{cm}^{-1}$ ;  $^1\text{H}$  NMR (400 MHz,  $\text{CDCl}_3$ )  $\delta$  7.77 – 7.75 (m, 2 H), 7.45 – 7.41 (m, 1 H), 7.34 – 7.32 (m, 2 H), 6.97 (t,  $J = 8.0$  Hz, 1 H), 6.63 – 6.61 (m, 2 H), 6.45 (dd,  $J_1 = 2.0$  Hz,  $J_2 = 8.0$  Hz, 1 H), 4.68 (s, 1 H), 1.79 – 1.76 (m, 2 H), 1.23 – 1.20 (m, 2 H) ppm;  $^{13}\text{C}$  NMR (100 MHz,  $\text{CDCl}_3$ )  $\delta$  203.44, 147.65, 137.20, 134.74, 131.97, 130.12, 128.19, 127.82, 118.15, 112.81, 111.11, 42.76, 18.95 ppm; HRMS (EI):  $m/z$  calcd for ( $\text{C}_{16}\text{H}_{14}\text{ClNO}$ ): 271.0764; found: 271.0763.

**1-(naphthalen-1-ylamino)cyclopropyl(phenyl)methanone (3h)**

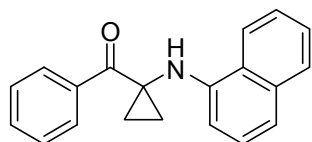

Light yellow solid, m.p. 131–132 °C; IR (neat)  $\nu$  3434, 3068, 2920, 1654, 1577, 1407, 1326, 1202, 1174, 973, 850, 770, 713  $\text{cm}^{-1}$ ;  $^1\text{H}$  NMR (400 MHz,  $\text{CDCl}_3$ )  $\delta$  7.84 – 7.82 (m, 2 H), 7.72 – 7.70 (m, 1 H), 7.65 (d,  $J = 8.0$  Hz, 1 H), 7.37 – 7.18 (m, 7 H), 6.80 (d,  $J = 8.0$  Hz, 1 H), 5.30 (b, 1 H), 1.88 – 1.85 (m, 2 H), 1.33 – 1.30 (m, 2 H) ppm;  $^{13}\text{C}$  NMR (100 MHz,  $\text{CDCl}_3$ )  $\delta$  204.14, 141.57, 137.25, 134.08, 131.88, 128.63, 128.10, 127.78, 126.40, 125.63, 124.72, 122.80, 119.29, 118.24, 106.21, 43.05, 18.96 ppm; HRMS (EI):  $m/z$  calcd for ( $\text{C}_{20}\text{H}_{17}\text{NO}$ ): 287.1310; found: 287.1311.

**(4-methoxyphenyl)(1-(phenylamino)cyclopropyl)methanone (3i)**

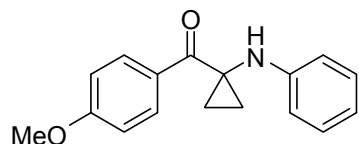

White solid, m.p.129–130 °C; IR (neat)  $\nu$  3389, 3054, 2932, 1651, 1600, 1511, 1433, 1316, 1265, 1169, 1026, 977, 840, 745, 691  $\text{cm}^{-1}$ ;  $^1\text{H}$  NMR (400 MHz,  $\text{CDCl}_3$ )  $\delta$  7.90 (d,  $J$  = 8.0 Hz, 2 H), 7.08 (t,  $J$  = 8.0 Hz, 1 H), 6.83 – 6.81 (m, 1 H), 6.66 (t,  $J$  = 7.2 Hz, 1 H), 6.60 (d,  $J$  = 8.0 Hz, 2 H), 4.55 (s, 1 H), 3.78 (s, 3 H), 1.74 – 1.71 (m, 2 H), 1.17 – 1.14 (m, 2 H) ppm;  $^{13}\text{C}$  NMR (100 MHz,  $\text{CDCl}_3$ )  $\delta$  201.18, 162.65, 146.56, 130.66, 129.80, 129.09, 118.11, 113.40, 113.10, 55.27, 42.76, 18.68 ppm; HRMS (EI):  $m/z$  calcd for ( $\text{C}_{17}\text{H}_{17}\text{NO}_2$ ): 267.1259; found: 267.1261.

#### (4-chlorophenyl)(1-(phenylamino)cyclopropyl)methanone (3j)

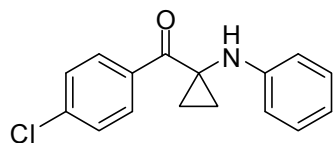

Light yellow solid, m.p.146–147 °C; IR (neat)  $\nu$  3393, 2961, 2923, 1661, 1599, 1510, 1488, 1317, 1201, 1089, 978, 830, 747, 692  $\text{cm}^{-1}$ ;  $^1\text{H}$  NMR (400 MHz,  $\text{CDCl}_3$ )  $\delta$  7.76 (d,  $J$  = 8.4 Hz, 2 H), 7.28 (d,  $J$  = 8.4 Hz, 2 H), 7.09 (t,  $J$  = 8.0 Hz, 2 H), 6.68 (t,  $J$  = 7.6 Hz, 1 H), 6.55 (d,  $J$  = 8.0 Hz, 2 H), 4.48 (s, 1 H), 1.79 – 1.76 (m, 2 H), 1.23 – 1.20 (m, 2 H) ppm;  $^{13}\text{C}$  NMR (100 MHz,  $\text{CDCl}_3$ )  $\delta$  202.73, 146.24, 138.08, 135.72, 129.54, 129.17, 128.38, 118.38, 112.96, 43.06, 19.56 ppm; HRMS (EI):  $m/z$  calcd for ( $\text{C}_{16}\text{H}_{14}\text{NO}$ ): 271.0764; found: 271.0763.

#### (1-(methyl(phenyl)amino)cyclopropyl)(phenyl)methanone (3k)

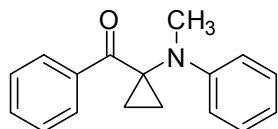

Light yellow liquid; IR(neat)  $\nu$  3061, 2925, 1670, 1599, 1504, 1358, 1290, 1196, 1042, 988, 750, 695  $\text{cm}^{-1}$ ;  $^1\text{H}$  NMR (400 MHz,  $\text{CDCl}_3$ )  $\delta$  7.57 – 7.55 (m, 2 H), 7.42 – 7.38 (m, 1 H), 7.30 – 7.20 (m, 4 H), 6.76 – 6.72 (m, 3 H), 2.92 (s, 3 H), 1.95 (br, 2 H), 1.35 (br, 2 H) ppm;  $^{13}\text{C}$  NMR (100 MHz,  $\text{CDCl}_3$ )  $\delta$  206.39, 148.00, 139.07, 131.15, 128.91, 127.98, 127.30, 117.17, 112.96, 51.34, 37.70 ppm; HRMS (EI):  $m/z$  calcd for ( $\text{C}_{17}\text{H}_{17}\text{NO}$ ): 251.1310; found: 251.1312.

**(1-(methyl(phenyl)amino)cyclopropyl)(p-tolyl)methanone (3l)**

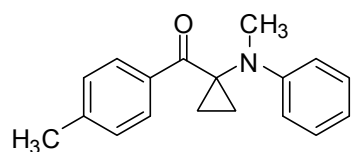

Light yellow liquid; IR (neat)  $\nu$  3028, 2924, 1658, 1600, 1504, 1360, 1292, 1179, 992, 822, 749, 694  $\text{cm}^{-1}$ ;  $^1\text{H}$  NMR (400 MHz,  $\text{CDCl}_3$ )  $\delta$  7.52 (d,  $J = 8.4$  Hz, 2 H), 7.24 – 7.19 (m, 2 H), 7.07 (d,  $J = 8.0$  Hz, 2 H), 6.75 – 6.72 (m, 3 H), 2.93 (s, 3 H), 2.30 (s, 3 H), 1.93 (br, 2 H), 1.31 (br, 2 H) ppm;  $^{13}\text{C}$  NMR (100 MHz,  $\text{CDCl}_3$ )  $\delta$  205.62, 148.00, 141.94, 136.02, 128.93, 128.77, 127.81, 117.09, 113.03, 51.28, 37.78, 21.43 ppm; HRMS (EI):  $m/z$  calcd for ( $\text{C}_{18}\text{H}_{19}\text{NO}$ ): 265.1467; found: 265.1469.

**(4-bromophenyl)(1-(methyl(phenyl)amino)cyclopropyl)methanone (3m)**

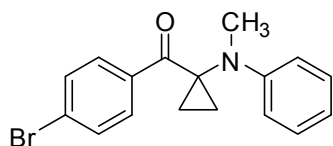

Light yellow solid, m.p. 89–90 °C; IR (neat)  $\nu$  3030, 2925, 1667, 1599, 1504, 1360, 1288, 1155, 1071, 986, 822, 746, 691  $\text{cm}^{-1}$ ;  $^1\text{H}$  NMR (400 MHz,  $\text{CDCl}_3$ )  $\delta$  7.47 – 7.40 (m, 4 H), 7.25 – 7.21 (m, 2 H), 6.77 – 6.70 (m, 3 H), 2.90 (s, 3 H), 1.94 (br, 2 H), 1.35 (br, 2 H) ppm;  $^{13}\text{C}$  NMR (100 MHz,  $\text{CDCl}_3$ )  $\delta$  205.50, 147.43, 137.55, 131.33, 129.21, 129.06, 126.26, 117.43, 112.99, 51.42, 37.75 ppm; HRMS (EI):  $m/z$  calcd for ( $\text{C}_{17}\text{H}_{16}\text{BrNO}$ ): 329.0415; found: 329.0417.

**phenyl((1R,2R)-2-phenyl-1-(phenylamino)cyclopropyl)methanone (4a)**

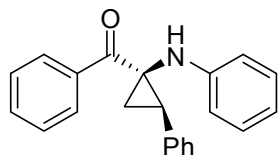

White solid, m.p. 140–141 °C; IR (neat)  $\nu$  3335, 3060, 2925, 1667, 1600, 1499, 1445, 1317, 1267, 1177, 1072, 977, 752, 694  $\text{cm}^{-1}$ ;  $^1\text{H}$  NMR (400 MHz,  $\text{CDCl}_3$ )  $\delta$  7.76 – 7.74 (m, 2 H), 7.43 – 7.30 (m, 6 H), 7.25 – 7.23 (m, 2 H), 7.08 (t,  $J = 8.0$  Hz, 2 H), 6.67 (t,  $J = 7.6$  Hz, 1 H), 6.49 (d,  $J = 8.0$  Hz, 2 H), 3.77 (s, 1 H), 2.95 (t,  $J = 8.6$  Hz, 1 H), 2.65 (dd,  $J_1 = 5.2$  Hz,  $J_2 = 9.6$  Hz, 1 H), 1.50 (dd,  $J_1 = 5.2$  Hz,  $J_2 = 7.6$  Hz, 1 H) ppm;  $^{13}\text{C}$  NMR (100 MHz,  $\text{CDCl}_3$ ):  $\delta$  203.18, 146.65,



136.97, 134.16, 131.92, 129.11, 128.85, 128.67, 128.29, 128.05, 127.64, 118.22, 113.21, 48.36,  
38.06, 19.89 ppm; HRMS (EI):  $m/z$  calcd for (C<sub>22</sub>H<sub>19</sub>NO): 313.1467; found: 313.1469.

The single-crystal X-ray Structure of compound **4a** is below.

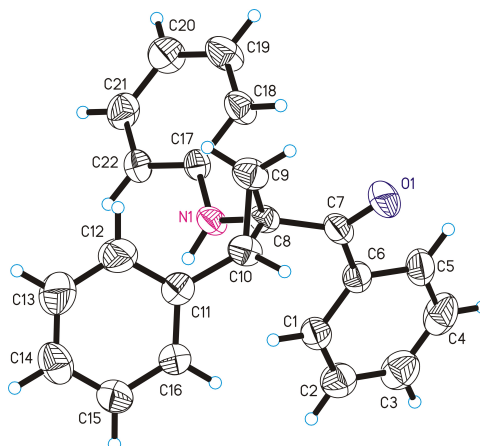

**phenyl((1R,2R)-2-phenyl-1-(p-tolylamino)cyclopropyl)methanone (4b)**

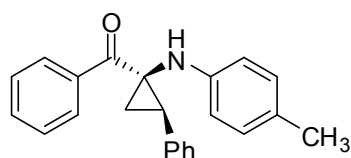

Light yellow solid, m.p.127–128 °C; IR (neat)  $\nu$  3398, 3027, 2917, 1667, 1518, 1447, 1325, 1265,  
981, 810, 742, 696 cm<sup>-1</sup>; <sup>1</sup>H NMR (400 MHz, CDCl<sub>3</sub>)  $\delta$  7.77 – 7.75 ( m , 2 H), 7.43 – 7.39 (m, 3  
H), 7.36 – 7.30 (m, 3 H), 7.23 – 7.22 ( m , 2 H), 6.89 ( d,  $J$  = 6.4 Hz, 2 H), 6.40 (d,  $J$  = 6.8 Hz, 2  
H), 3.65 (s, 1 H), 2.94 (t,  $J$  = 7.0 Hz, 1 H), 2.63 (dd,  $J$ <sub>1</sub> = 4.0 Hz,  $J$ <sub>2</sub> = 7.6 Hz, 1 H), 2.18 (s, 3 H),  
1.48(dd,  $J$ <sub>1</sub> = 4.0 Hz,  $J$ <sub>2</sub> = 6.2 Hz, 1 H) ppm; <sup>13</sup>C NMR (100 MHz, CDCl<sub>3</sub>)  $\delta$  203.42, 144.35,  
137.09, 134.32, 131.90, 129.66, 128.89, 128.38, 128.06, 127.62, 127.42, 113.29, 48.52, 38.31,  
20.32, 19.92 ppm; HRMS (EI):  $m/z$  calcd for (C<sub>23</sub>H<sub>21</sub>NO): 327.1623; found: 327.1627.

**((1R,2R)-1-(4-chlorophenylamino)-2-phenylcyclopropyl)(phenyl)methanone (4c)**

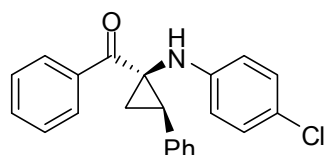

Light yellow solid, m.p.133–134 °C; IR (neat)  $\nu$  3397, 3061, 2912, 1668, 1598, 1495, 1326, 1267,  
1175, 1092, 982, 817, 698 cm<sup>-1</sup>; <sup>1</sup>H NMR (400 MHz, CDCl<sub>3</sub>)  $\delta$  7.73 – 7.72 ( m , 2 H), 7.43 – 7.31  
(m, 6 H), 7.25 – 7.22 ( m , 2 H), 7.01 ( d,  $J$  = 7.2 Hz, 2 H) , 6.40 ( d,  $J$  = 6.8 Hz, 2 H), 3.79 (s, 1 H),

2.97 (t,  $J = 6.8$  Hz, 1 H), 2.62 (dd,  $J_1 = 4.4$  Hz,  $J_2 = 7.6$  Hz, 1 H), 1.47 (dd,  $J_1 = 4.4$  Hz,  $J_2 = 6.4$  Hz, 1 H) ppm;  $^{13}\text{C}$  NMR (100 MHz,  $\text{CDCl}_3$ )  $\delta$  202.82, 145.21, 136.87, 133.97, 132.08, 129.02, 128.82, 128.77, 128.19, 128.17, 127.78, 122.98, 114.28, 48.38, 37.85, 19.88 ppm; HRMS (EI):  $m/z$  calcd for ( $\text{C}_{22}\text{H}_{18}\text{ClNO}$ ): 347.1077; found: 347.1075.

**phenyl(quinolin-2-yl)methanone (5a)<sup>4</sup>**

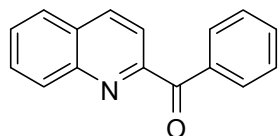

White solid, m.p. 106–107 °C; IR (neat)  $\nu$  1658, 1592, 1441, 1381, 1168, 849, 783, 754  $\text{cm}^{-1}$ ;  $^1\text{H}$  NMR (400 MHz,  $\text{CDCl}_3$ )  $\delta$  8.33 (d,  $J = 8.4$  Hz, 1 H), 8.23 (d,  $J = 7.6$  Hz, 2 H), 8.19 (d,  $J = 8.4$  Hz, 1 H), 8.10 (d,  $J = 8.4$  Hz, 1 H), 7.89 (d,  $J = 8.0$  Hz, 1 H), 7.78 (t,  $J = 7.6$  Hz, 1 H), 7.67 – 7.60 (m, 2 H), 7.51 (t,  $J = 7.6$  Hz, 2 H) ppm;  $^{13}\text{C}$  NMR (100 MHz,  $\text{CDCl}_3$ )  $\delta$  193.77, 154.62, 146.66, 137.07, 136.07, 133.03, 131.41, 130.05, 128.84, 128.37, 128.11, 127.60, 120.75 ppm; HRMS (EI):  $m/z$  calcd for ( $\text{C}_{16}\text{H}_{11}\text{NO}$ ): 233.0841; found: 233.0850.

**(6-methoxyquinolin-2-yl)(phenyl)methanone (5b)<sup>5</sup>**

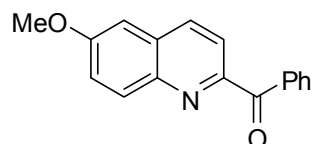

White solid, m.p. 118–119 °C; IR (neat)  $\nu$  1652, 1621, 1474, 1437, 1328, 1234, 1029, 970, 871, 726, 690  $\text{cm}^{-1}$ ;  $^1\text{H}$  NMR (400 MHz,  $\text{CDCl}_3$ )  $\delta$  8.16 – 8.12 (m, 3 H), 8.04 – 7.99 (m, 2 H), 7.53 (t,  $J = 7.2$  Hz, 1 H), 7.43 (t,  $J = 7.6$  Hz, 2 H), 7.34 (dd,  $J_1 = 2.0$  Hz,  $J_2 = 9.6$  Hz, 1 H), 7.06 (s, 1 H), 3.89 (s, 3 H) ppm;  $^{13}\text{C}$  NMR (100 MHz,  $\text{CDCl}_3$ )  $\delta$  193.69, 159.33, 152.24, 142.73, 132.81, 131.40, 128.04, 123.12, 121.30, 104.78, 55.64 ppm; HRMS (EI):  $m/z$  calcd for ( $\text{C}_{17}\text{H}_{13}\text{NO}_2$ ): 263.0946; found: 263.0944.

**(6-chloroquinolin-2-yl)(phenyl)methanone (5c)**

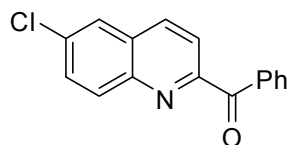

White solid, m.p.145–146 °C; IR (neat)  $\nu$  1656, 1598, 1456, 1322, 1287, 1192, 1074, 968, 876, 703, 686  $\text{cm}^{-1}$ ;  $^1\text{H}$  NMR (500 MHz,  $\text{CDCl}_3$ )  $\delta$  8.27 (d,  $J$  = 10.5 Hz, 1 H), 8.22 (d,  $J$  = 9.5 Hz, 2 H), 8.14 (d,  $J$  = 11.0 Hz, 2 H), 7.90 (d,  $J$  = 2.5 Hz, 1 H), 7.72 (dd,  $J_1$  = 2.5 Hz,  $J_2$  = 11.0 Hz, 1 H), 7.64 (t,  $J$  = 9.5 Hz, 1 H), 7.52 (t,  $J$  = 9.5 Hz, 2 H) ppm;  $^{13}\text{C}$  NMR (125 MHz,  $\text{CDCl}_3$ )  $\delta$  193.38, 154.82, 145.06, 136.18, 135.95, 134.38, 133.17, 132.09, 131.14, 129.44, 128.18, 126.33, 121.71 ppm; HRMS (EI):  $m/z$  calcd for ( $\text{C}_{16}\text{H}_{10}\text{ClNO}$ ):267.0451; found: 267.0449.

**(8-methylquinolin-2-yl)(phenyl)methanone (5d)**

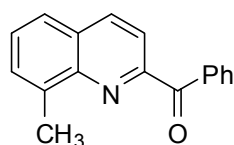

Light yellow solid, m.p.118–119 °C; IR (neat)  $\nu$  1658, 1596, 1444, 1320, 1286, 1157, 947, 870, 846, 725, 690  $\text{cm}^{-1}$ ;  $^1\text{H}$  NMR (500 MHz,  $\text{CDCl}_3$ )  $\delta$  8.35 (d,  $J$  = 8.0 Hz, 2 H), 8.29 (d,  $J$  = 8.5 Hz, 1 H), 8.17 (d,  $J$  = 8.5 Hz, 1 H), 7.71 (d,  $J$  = 8.0 Hz, 1 H), 7.61 (t,  $J$  = 7.0 Hz, 2 H), 7.55 – 7.49 (m, 3 H), 2.77 (s, 3 H) ppm;  $^{13}\text{C}$  NMR (125 MHz,  $\text{CDCl}_3$ )  $\delta$  193.39, 153.03, 145.77, 138.78, 137.18, 136.52, 132.66, 131.66, 130.03, 128.93, 128.30, 127.81, 125.45, 120.36, 17.90 ppm; HRMS (EI):  $m/z$  calcd for ( $\text{C}_{17}\text{H}_{13}\text{NO}$ ): 247.0997; found:247.0995.

**(7-methoxyquinolin-2-yl)(phenyl)methanone (5e)**

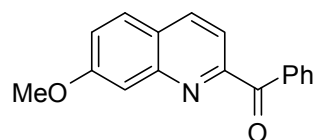

Light yellow solid, m.p.173–174 °C; IR (neat)  $\nu$  1660, 1588, 1466, 1358, 1266, 1090, 959, 849, 792, 688  $\text{cm}^{-1}$ ;  $^1\text{H}$  NMR (400 MHz,  $\text{CDCl}_3$ )  $\delta$  8.67 (d,  $J$  = 8.4 Hz, 1 H), 8.14 (d,  $J$  = 7.6 Hz, 2 H), 7.98 (d,  $J$  = 8.8 Hz, 1 H), 7.69 (d,  $J$  = 8.4 Hz, 1 H), 7.59 – 7.52 (m, 2 H), 7.43 (t,  $J$  = 7.6 Hz, 2 H), 6.87 (d,  $J$  = 7.6 Hz, 1 H), 3.96 (s, 3 H) ppm;  $^{13}\text{C}$  NMR (125 MHz,  $\text{CDCl}_3$ )  $\delta$  193.93, 155.00, 154.91, 147.51, 136.13, 133.01, 131.98, 131.40, 130.02, 128.10, 122.40, 121.40, 119.83, 105.78, 55.84 ppm; HRMS (EI):  $m/z$  calcd for ( $\text{C}_{17}\text{H}_{13}\text{NO}_2$ ): 263.0946; found: 263.0945.

**(5-methoxyquinolin-2-yl)(phenyl)methanone (5e')**

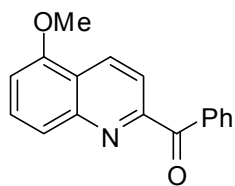

Light yellow solid, m.p. 66–67 °C; IR (neat)  $\nu$  1661, 1621, 1596, 1456, 1385, 1219, 1027, 980, 903, 850, 721, 690  $\text{cm}^{-1}$ ;  $^1\text{H}$  NMR (400 MHz,  $\text{CDCl}_3$ )  $\delta$  8.18 (d,  $J = 8.4$  Hz, 1 H), 8.12 (d,  $J = 6.4$  Hz, 2 H), 7.87 (d,  $J = 8.4$  Hz, 1 H), 7.70 (d,  $J = 9.2$  Hz, 1 H), 7.55 (t,  $J = 7.2$  Hz, 1 H), 7.46–7.41 (m, 3 H), 7.23 (dd,  $J_1 = 2.4$  Hz,  $J_2 = 9.2$  Hz, 1 H), 3.88 (s, 3 H) ppm;  $^{13}\text{C}$  NMR (125 MHz,  $\text{CDCl}_3$ )  $\delta$  194.12, 161.18, 154.91, 148.55, 136.66, 136.24, 133.01, 131.35, 128.55, 128.15, 124.28, 121.87, 118.82, 107.98, 55.64 ppm; HRMS (EI):  $m/z$  calcd for ( $\text{C}_{17}\text{H}_{13}\text{NO}_2$ ): 263.0946; found: 263.0947.

**(7-chloroquinolin-2-yl)(phenyl)methanone (5f)**

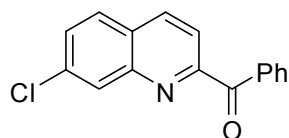

White solid, m.p. 90–91 °C; IR (neat)  $\nu$  1663, 1595, 1460, 1321, 1158, 951, 817, 757, 716, 691  $\text{cm}^{-1}$ ;  $^1\text{H}$  NMR (400 MHz,  $\text{CDCl}_3$ )  $\delta$  8.77 (d,  $J = 8.8$  Hz, 1 H), 8.23–8.19 (m, 3 H), 8.13 (d,  $J = 8.0$  Hz, 1 H), 7.75–7.63 (m, 3 H), 7.53 (t,  $J = 7.6$  Hz, 2 H) ppm;  $^{13}\text{C}$  NMR (125 MHz,  $\text{CDCl}_3$ )  $\delta$  193.35, 155.24, 147.39, 135.88, 134.13, 133.25, 131.44, 131.37, 129.78, 129.67, 128.31, 128.21, 126.98, 121.61 ppm; HRMS (EI):  $m/z$  calcd for ( $\text{C}_{16}\text{H}_{10}\text{ClNO}$ ): 267.0451; found: 267.0455.

**(5-chloroquinolin-2-yl)(phenyl)methanone (5f')**

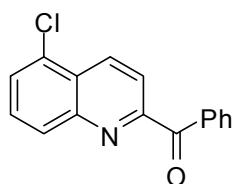

White solid, m.p. 118–119 °C; IR (neat)  $\nu$  1658, 1598, 1448, 1323, 1162, 1065, 932, 858, 718, 698  $\text{cm}^{-1}$ ;  $^1\text{H}$  NMR (400 MHz,  $\text{CDCl}_3$ )  $\delta$  8.34 (d,  $J = 8.8$  Hz, 1 H), 8.22–8.21 (m, 3 H), 8.11 (d,  $J = 8.4$  Hz, 1 H), 7.86 (d,  $J = 8.8$  Hz, 1 H), 7.65–7.61 (m, 2 H), 7.53 (t,  $J = 7.6$  Hz, 2 H) ppm;  $^{13}\text{C}$  NMR (125 MHz,  $\text{CDCl}_3$ )  $\delta$  193.42, 155.53, 147.04, 137.01, 136.07, 135.90, 133.22, 131.39,

129.44, 129.39, 128.82, 128.19, 127.22, 121.01 ppm; HRMS (EI):  $m/z$  calcd for (C<sub>16</sub>H<sub>10</sub>ClNO): 267.0451; found: 267.0450.

**benzo[h]quinolin-2-yl(phenyl)methanone (5g)**

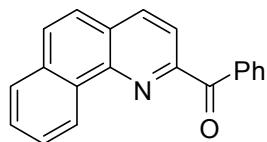

Light yellow solid, m.p. 108–109 °C; IR (neat)  $\nu$  1658, 1596, 1445, 1321, 1272, 1158, 1089, 944, 853, 732, 705 cm<sup>-1</sup>; <sup>1</sup>H NMR (500 MHz, CDCl<sub>3</sub>)  $\delta$  9.09 – 9.07 (m, 1 H), 8.30 – 8.24 (m, 4 H), 7.88 – 7.85 (m, 2 H), 7.69 (d,  $J$  = 8.5 Hz, 1 H), 7.67 – 7.63 (m, 2 H), 7.59 (t,  $J$  = 7.5 Hz, 1 H), 7.50 (t,  $J$  = 7.5 Hz, 2 H) ppm; <sup>13</sup>C NMR (125 MHz, CDCl<sub>3</sub>)  $\delta$  193.63, 152.74, 145.00, 136.73, 136.68, 133.78, 132.73, 131.79, 131.61, 129.94, 128.59, 127.99, 127.93, 127.66, 127.57, 124.94, 124.76, 121.86 ppm; HRMS (EI):  $m/z$  calcd for (C<sub>20</sub>H<sub>13</sub>NO): 283.0997; found: 283.0996.

**(4-methoxyphenyl)(quinolin-2-yl)methanone (5h)<sup>6</sup>**

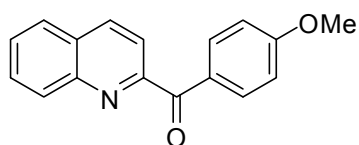

Light yellow solid, m.p. 154–155 °C; IR (neat)  $\nu$  1652, 1597, 1462, 1312, 1259, 1028, 924, 850, 774 cm<sup>-1</sup>; <sup>1</sup>H NMR (500 MHz, CDCl<sub>3</sub>)  $\delta$  8.23 (d,  $J$  = 8.5 Hz, 1 H), 8.20 (d,  $J$  = 9.0 Hz, 2 H), 8.11 (d,  $J$  = 8.5 Hz, 1 H), 7.97 (d,  $J$  = 8.5 Hz, 1 H), 7.80 (d,  $J$  = 8.0 Hz, 1 H), 7.70 – 7.67 (m, 1 H), 7.55 (t,  $J$  = 8.0 Hz, 1 H), 6.90 (d,  $J$  = 9.0 Hz, 2 H), 3.80 (s, 3 H) ppm; <sup>13</sup>C NMR (125 MHz, CDCl<sub>3</sub>)  $\delta$  192.17, 163.68, 155.32, 146.59, 136.97, 133.86, 130.36, 129.97, 128.87, 128.71, 128.14, 127.59, 120.84, 113.48, 55.44 ppm; HRMS (EI):  $m/z$  calcd for (C<sub>17</sub>H<sub>13</sub>NO<sub>2</sub>): 263.0946; found: 263.0950.

**(4-chlorophenyl)(quinolin-2-yl)methanone (5i)<sup>6</sup>**

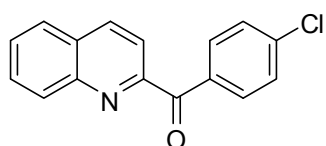

Light yellow solid, m.p.128–129 °C; IR (neat)  $\nu$  1663, 1589, 1459, 1318, 1211, 1090, 925, 850, 771  $\text{cm}^{-1}$ ;  $^1\text{H}$  NMR (500 MHz,  $\text{CDCl}_3$ )  $\delta$  8.36 (d,  $J$  = 8.5 Hz, 1 H), 8.24 (d,  $J$  = 8.5 Hz, 2 H), 8.19 (d,  $J$  = 8.5 Hz, 1 H), 8.14 (d,  $J$  = 8.5 Hz, 1 H), 7.92 (d,  $J$  = 8.0 Hz, 1 H), 7.80 (t,  $J$  = 7.5 Hz, 1 H), 7.68 (t,  $J$  = 7.5 Hz, 1 H), 7.50 (d,  $J$  = 8.5 Hz, 2 H) ppm;  $^{13}\text{C}$  NMR (125 MHz,  $\text{CDCl}_3$ )  $\delta$  192.37, 154.21, 146.66, 139.55, 137.25, 134.49, 132.92, 130.51, 130.21, 128.98, 128.62, 128.45, 127.67, 120.73 ppm; HRMS (EI):  $m/z$  calcd for ( $\text{C}_{16}\text{H}_{10}\text{ClNO}$ ): 267.0451; found: 267.0450.

#### phenyl(1-(phenylamino)cyclopropyl)methanol (3aa)

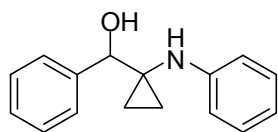

Colorless liquid; IR (neat)  $\nu$  3399, 3050, 3024, 1601, 1500, 1451, 1322, 1178, 1026, 750, 696  $\text{cm}^{-1}$ ;  $^1\text{H}$  NMR (400 MHz,  $\text{CDCl}_3$ )  $\delta$  7.33 – 7.25 (m, 5 H), 7.18 – 7.14 (m, 2 H), 6.74 – 6.69 (m, 3 H), 4.95 (s, 1 H), 4.18 (br, 1 H), 2.84 (br, 1 H), 1.03 – 0.97 (m, 1 H), 0.87 – 0.83 (m, 1 H), 0.78 – 0.70 (m, 2 H) ppm;  $^{13}\text{C}$  NMR (100 MHz,  $\text{CDCl}_3$ )  $\delta$  146.75, 141.76, 129.15, 128.12, 127.67, 126.59, 117.62, 113.64, 74.16, 39.17, 12.08, 10.92 ppm; HRMS (EI):  $m/z$  calcd for ( $\text{C}_{16}\text{H}_{17}\text{NO}$ ): 239.1310; found: 239.1310.

#### 4, 8-diphenyl-7-oxa-4-azaspiro[2.5]octane (6)

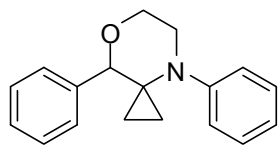

Light yellow liquid; a mixture of two isomers (19:4) in 84% yield; IR (neat)  $\nu$  3024, 2851, 1599, 1495, 1451, 1349, 1254, 1215, 1030, 987, 751, 706  $\text{cm}^{-1}$ ;  $^1\text{H}$  NMR (500 MHz,  $\text{CDCl}_3$ )  $\delta$  7.35 – 6.74 (m, , 10 H), 5.25 (s, 0.77 H), 4.72 (s, 0.23 H), 3.92 – 3.37 (m, 4 H), 1.05 – 0.56 (m, 4 H) ppm;  $^{13}\text{C}$  NMR (125 MHz,  $\text{CDCl}_3$ )  $\delta$  147.97, 146.83, 139.16, 137.80, 129.27, 129.18, 128.17, 127.86, 127.82, 127.55, 127.31, 127.04, 118.53, 117.68, 116.68, 113.86, 81.12, 77.50, 69.12, 65.37, 51.04, 42.18, 38.50, 31.03, 14.21, 11.50, 10.37, 9.38 ppm; HRMS (EI):  $m/z$  calcd for ( $\text{C}_{18}\text{H}_{19}\text{NO}$ ): 265.1417; found: 265.1468.

## References:

1. M. Pal, N.K. Swamy, P.S. Hameed, S. Padakanti, K.R. Yeleswarapu, *Tetrahedron*, **2004**, *60*, 3987.
2. M. Yar, E. M. McGarrigle, V. K. Aggarwal, *Angew. Chem., Int. Ed.* **2008**, *47*, 3784.
3. J. I. Matsuo, H. Yamanaka, A. Kawana, T. Mukaiyama, *Chem. Lett.* **2003**, *32*, 392.
4. Z.W. Yin, Z.X. Zhang, J.F. Kadow, N.A. Meanwell, T. Wang, *J. Org. Chem.* **2004**, *69*, 1364.
5. N.C. Rose, W.E. McEwen, *J. Org. Chem.* **1958**, *23*, 337-41.
6. B. Reux, T. Nevalainen, K.H. Raitio, A. M. P.Koskinen, *Bioorg. Med. Chem.* **2009**, *17*, 4441.

## Copies of $^1\text{H}$ NMR and $^{13}\text{C}$ NMR

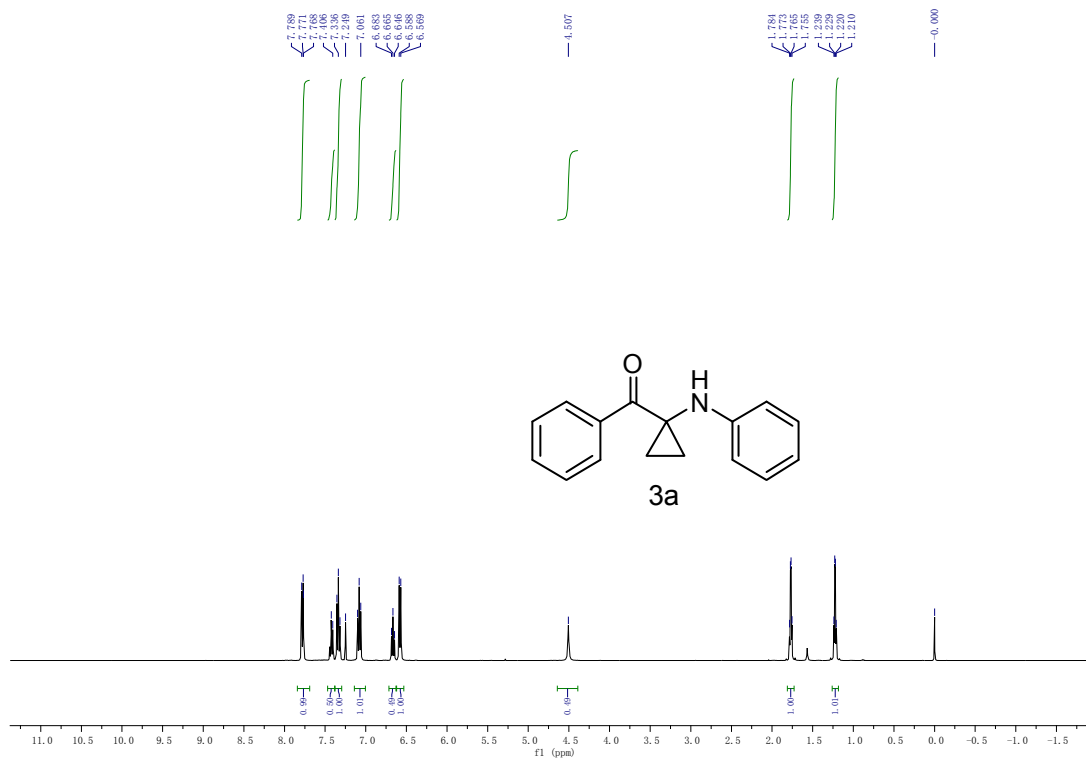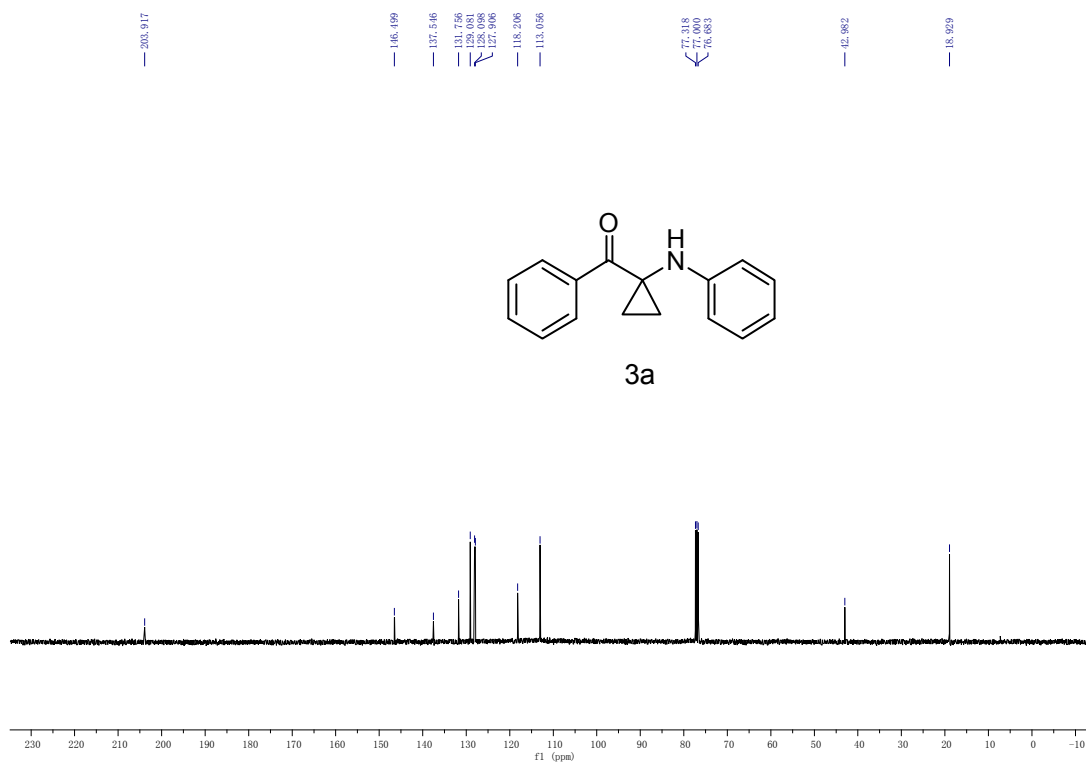



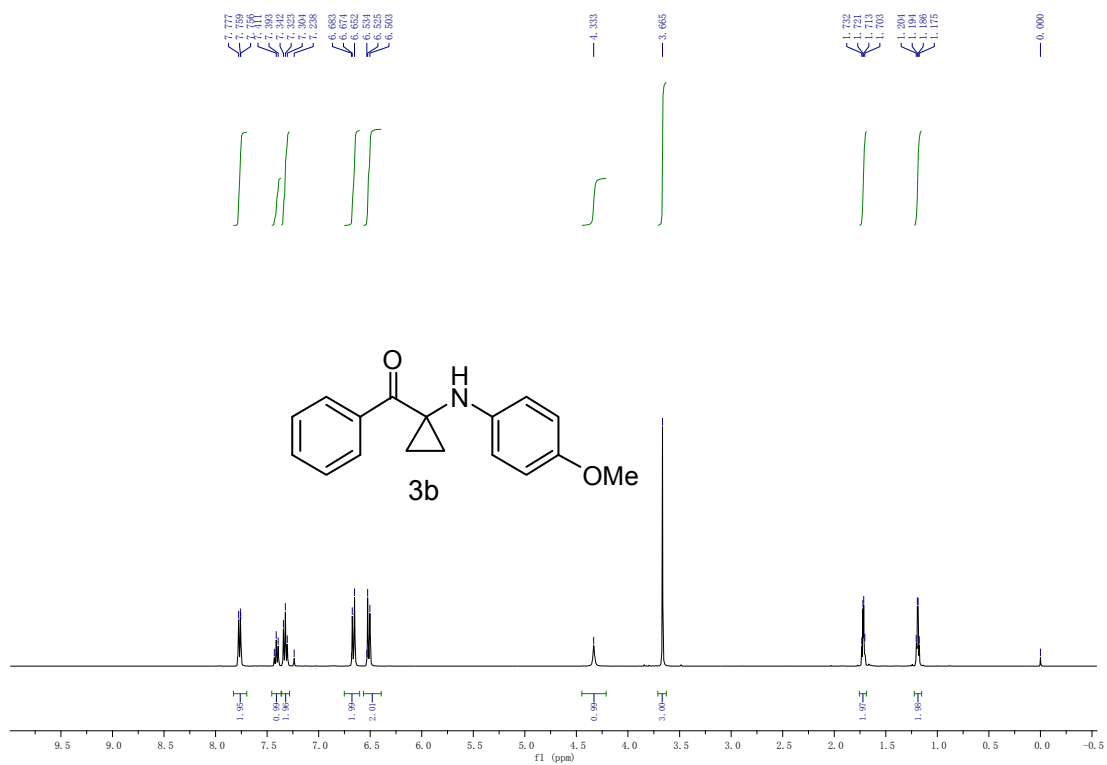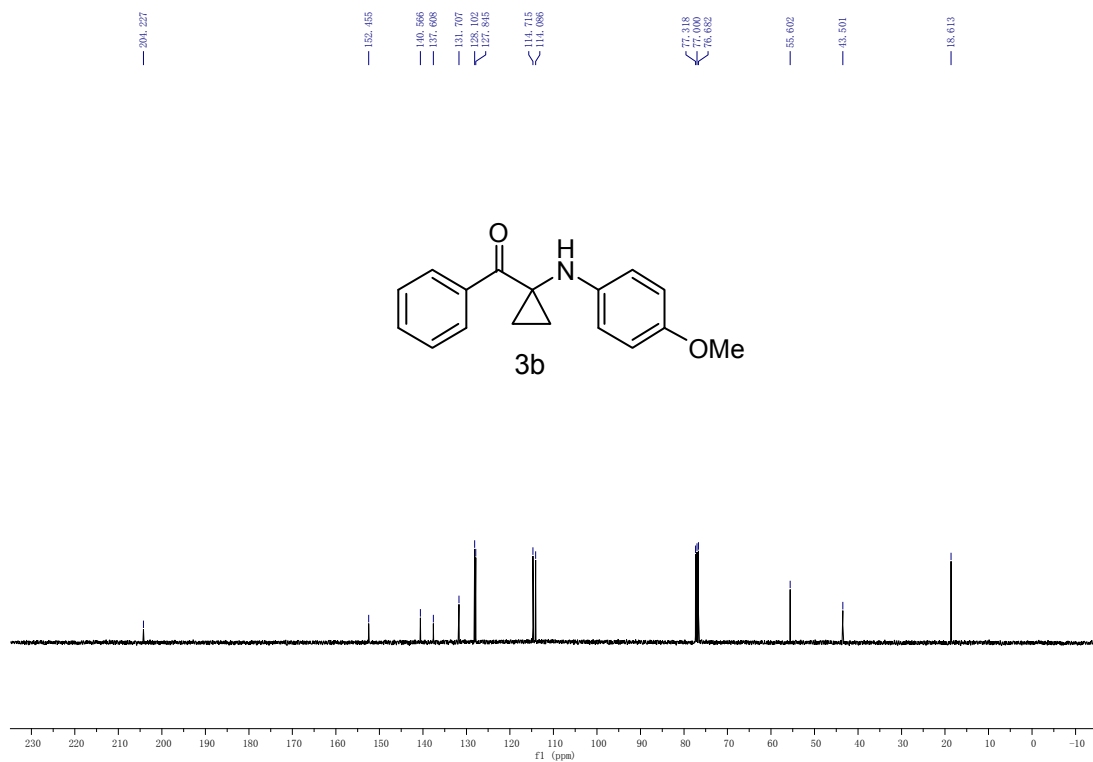

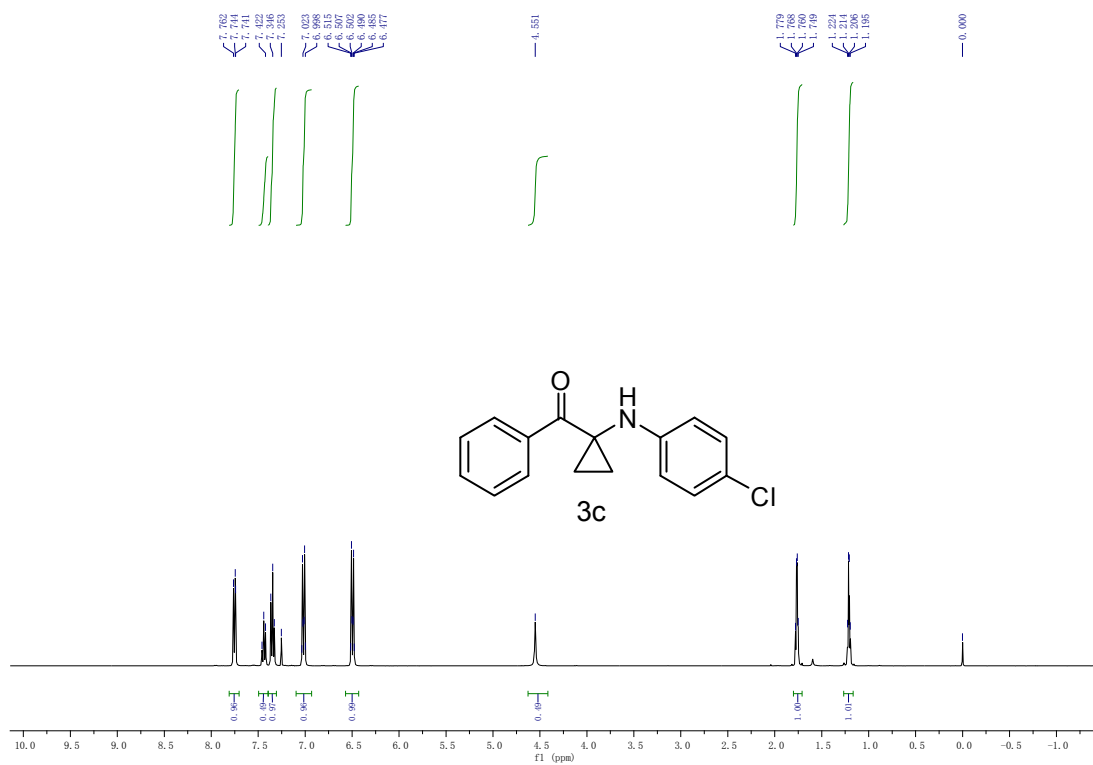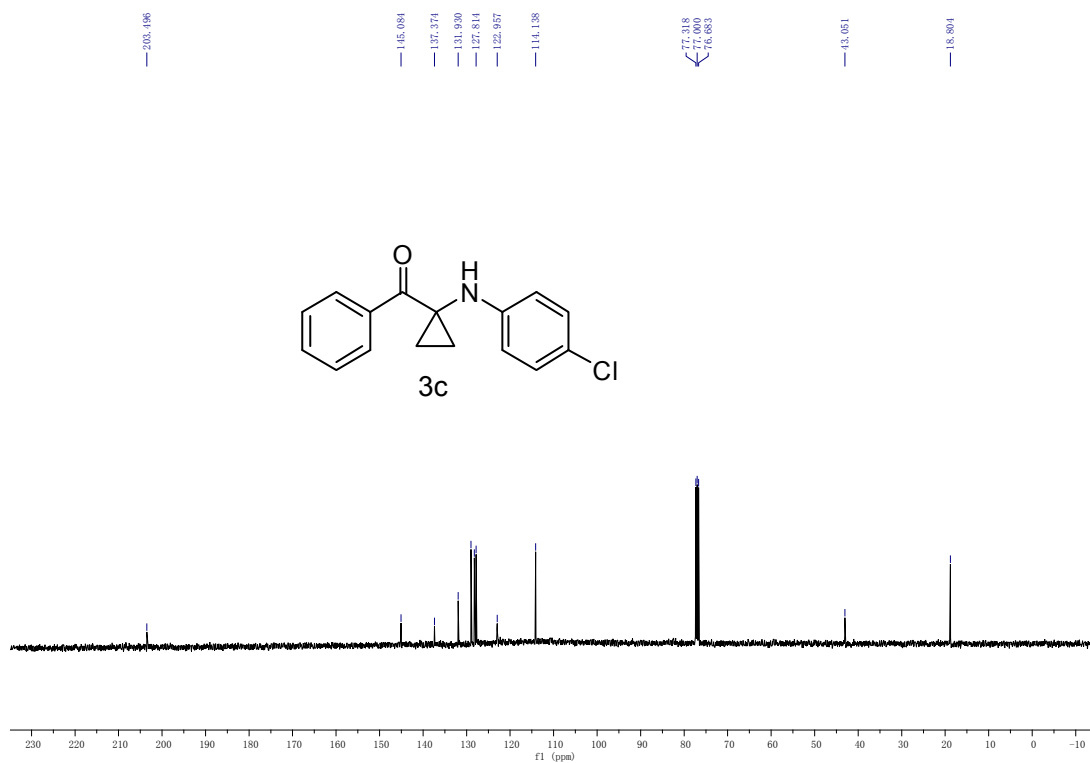

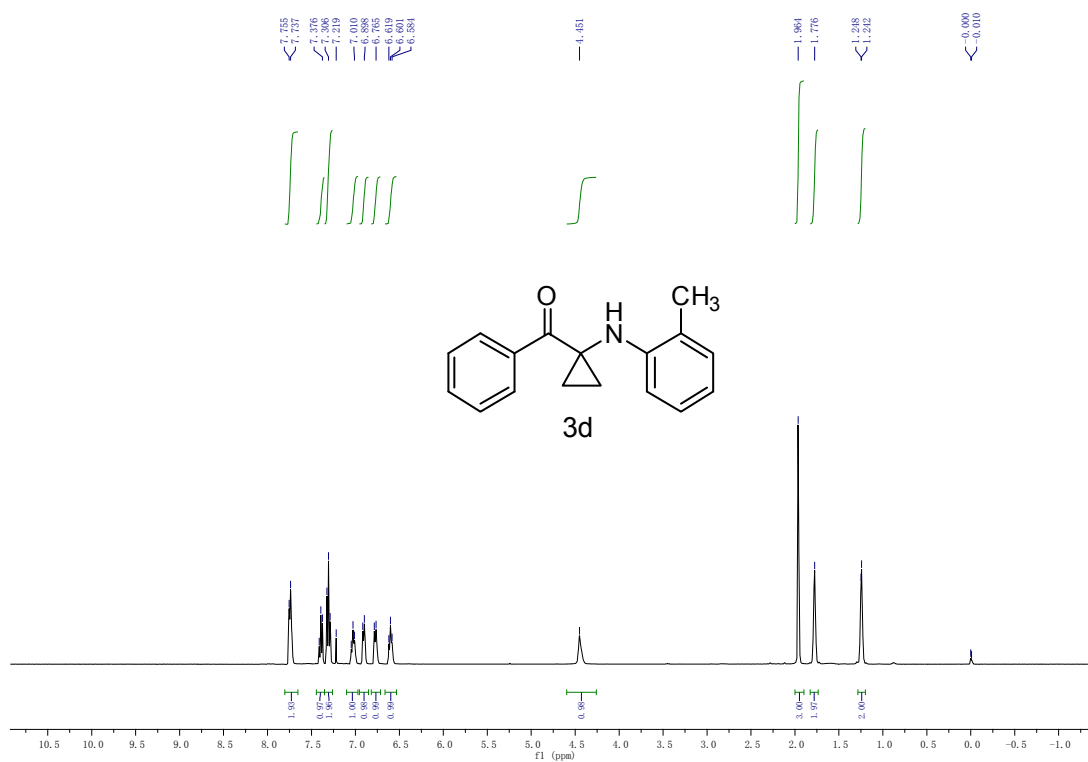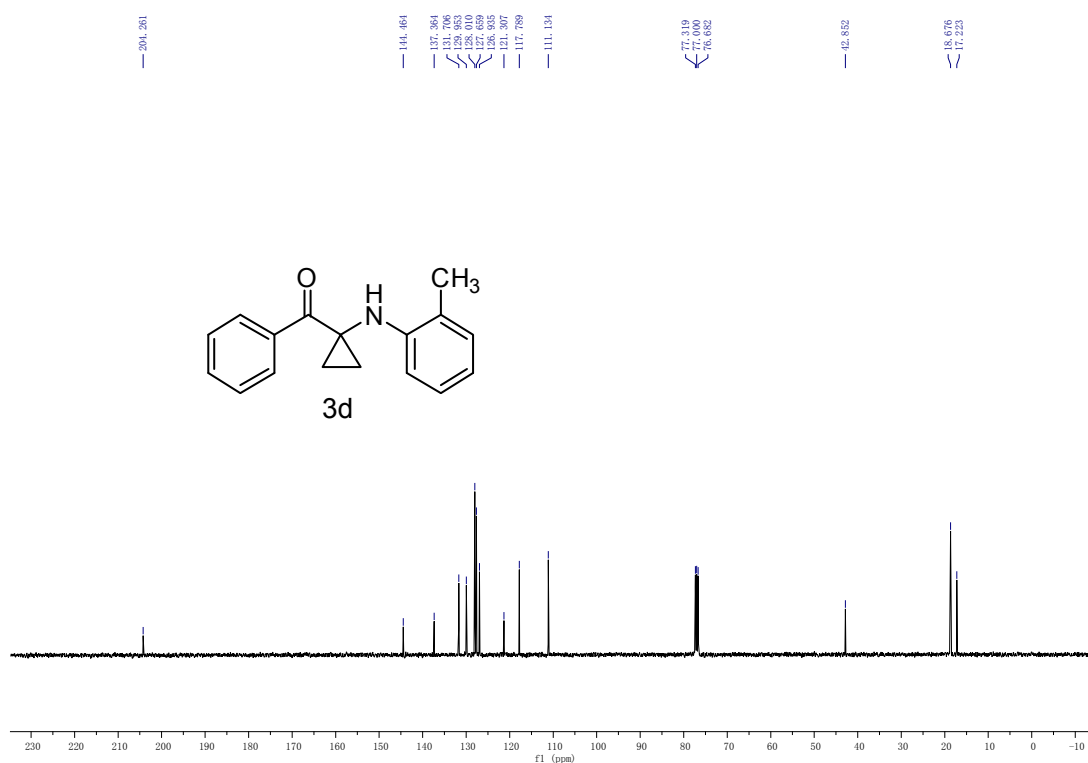

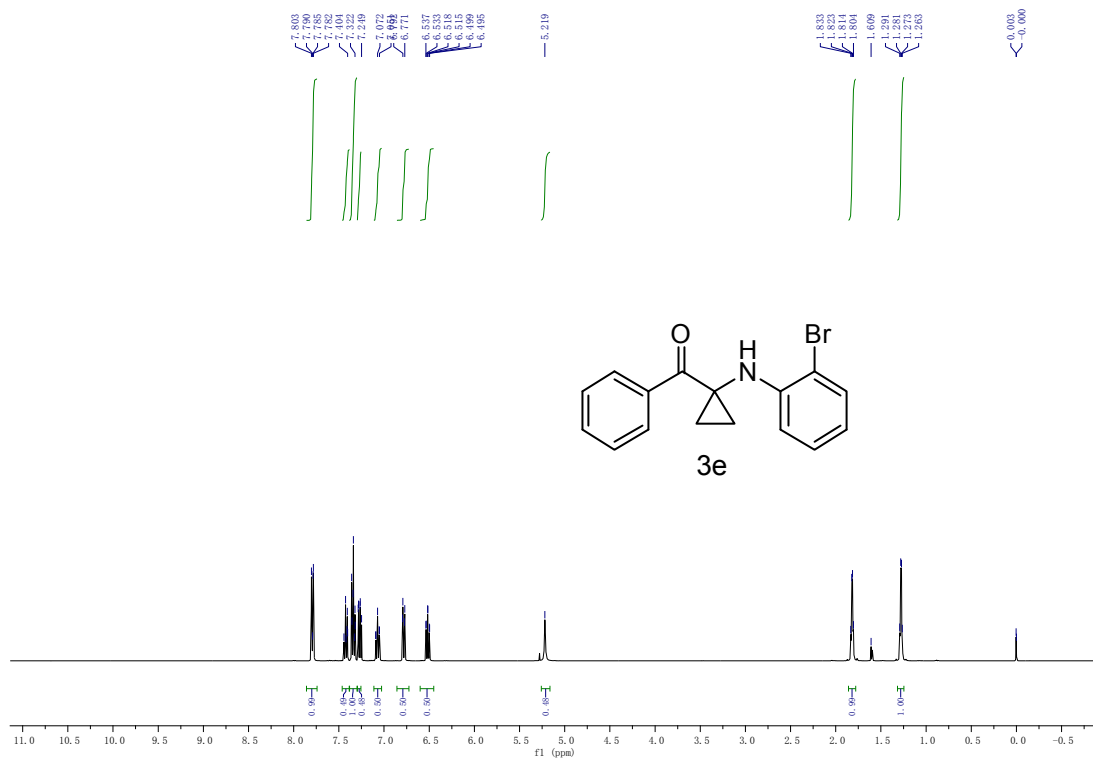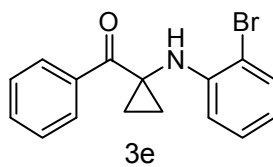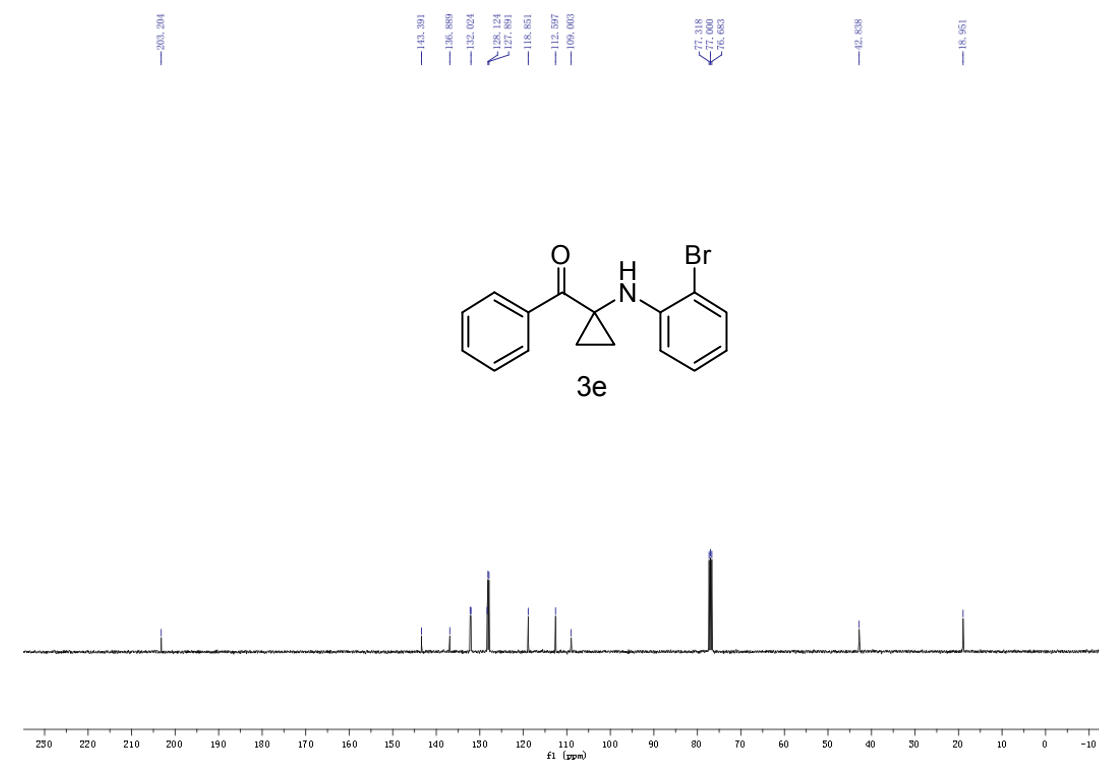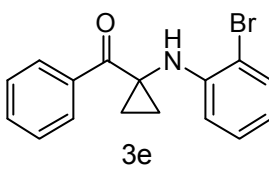

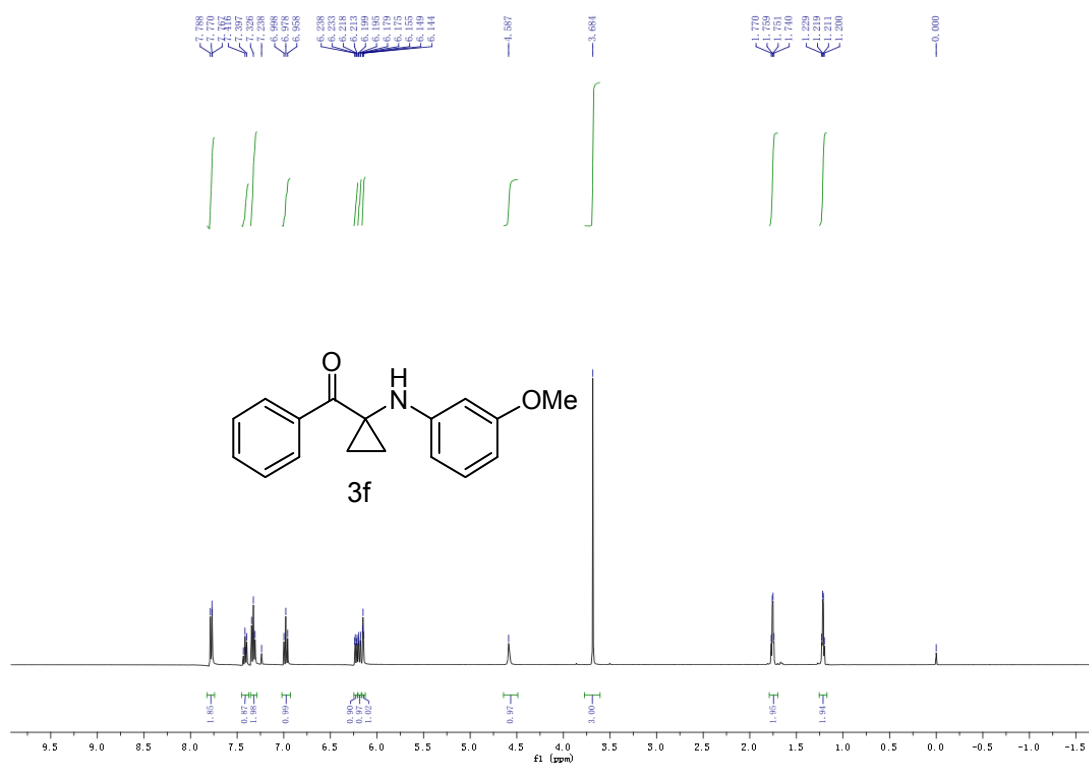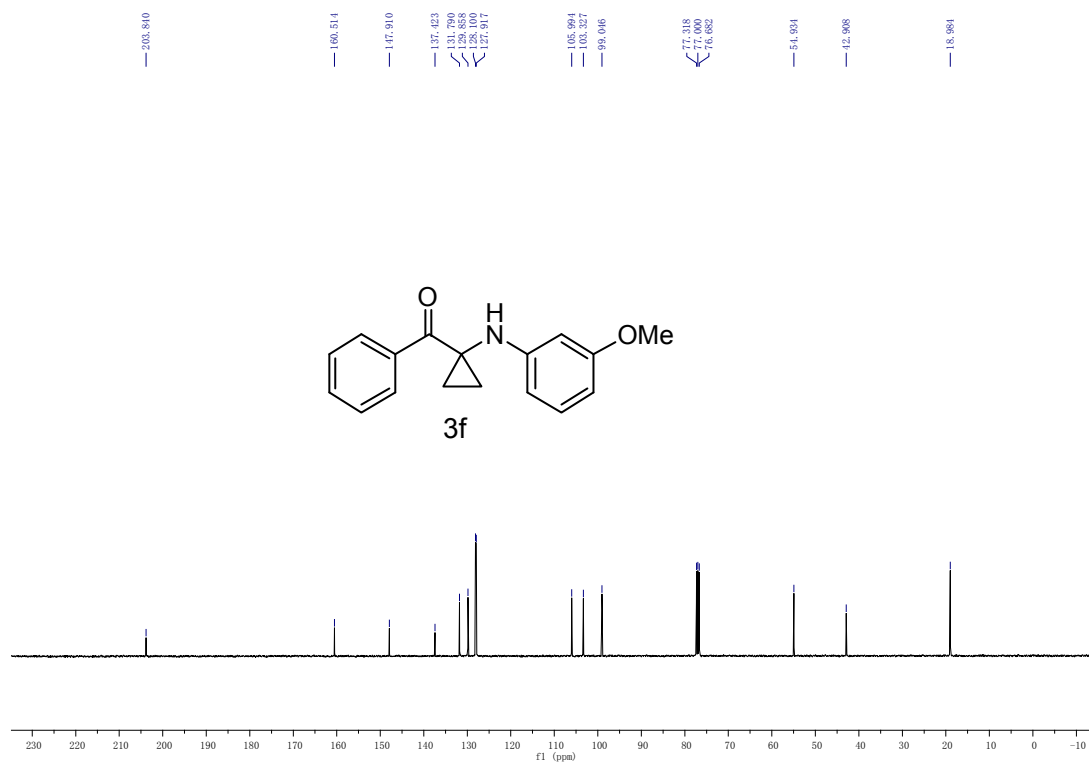

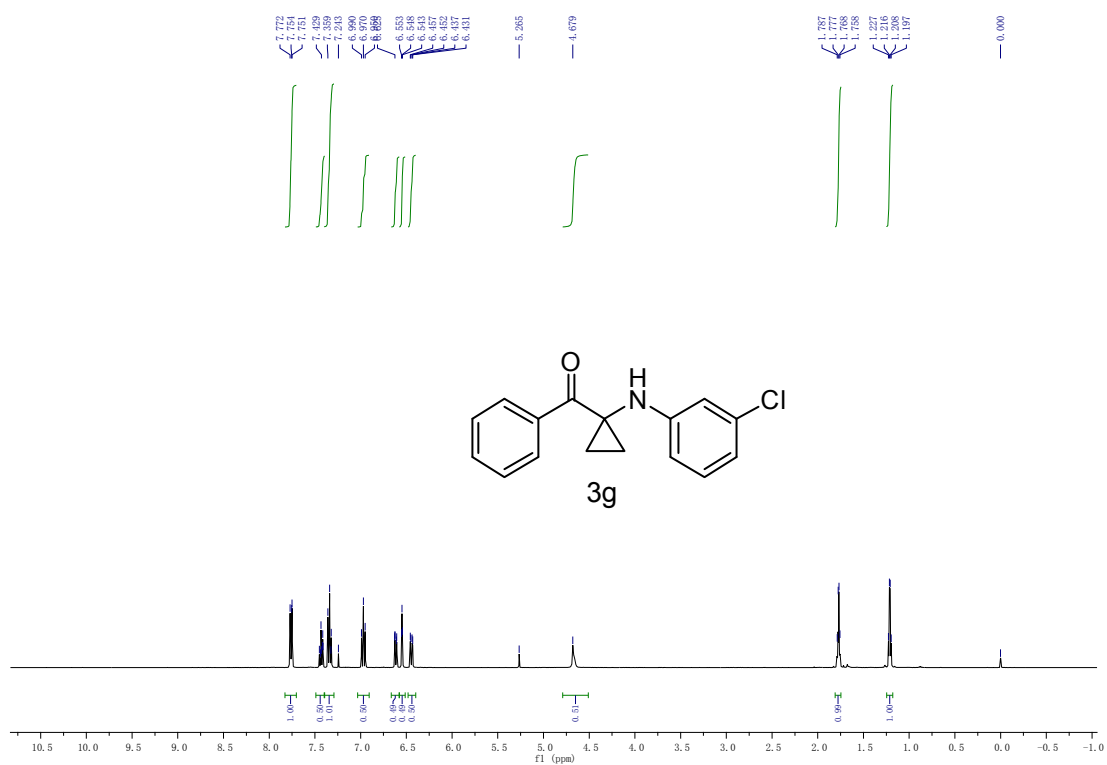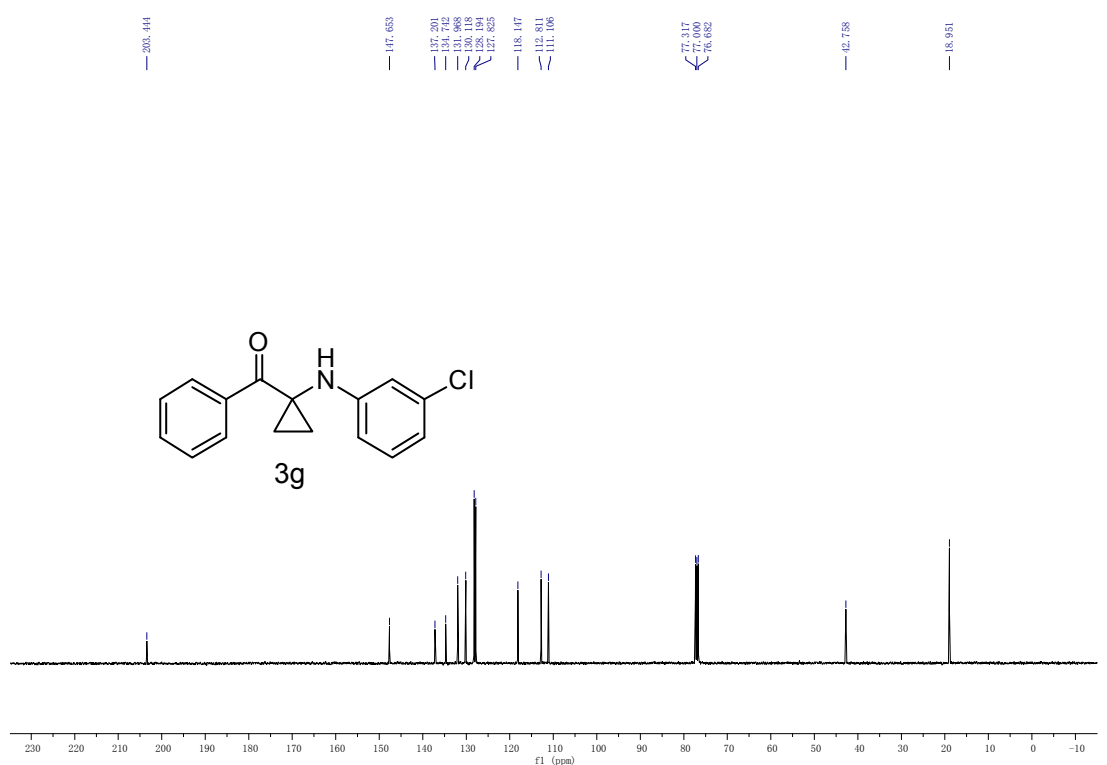

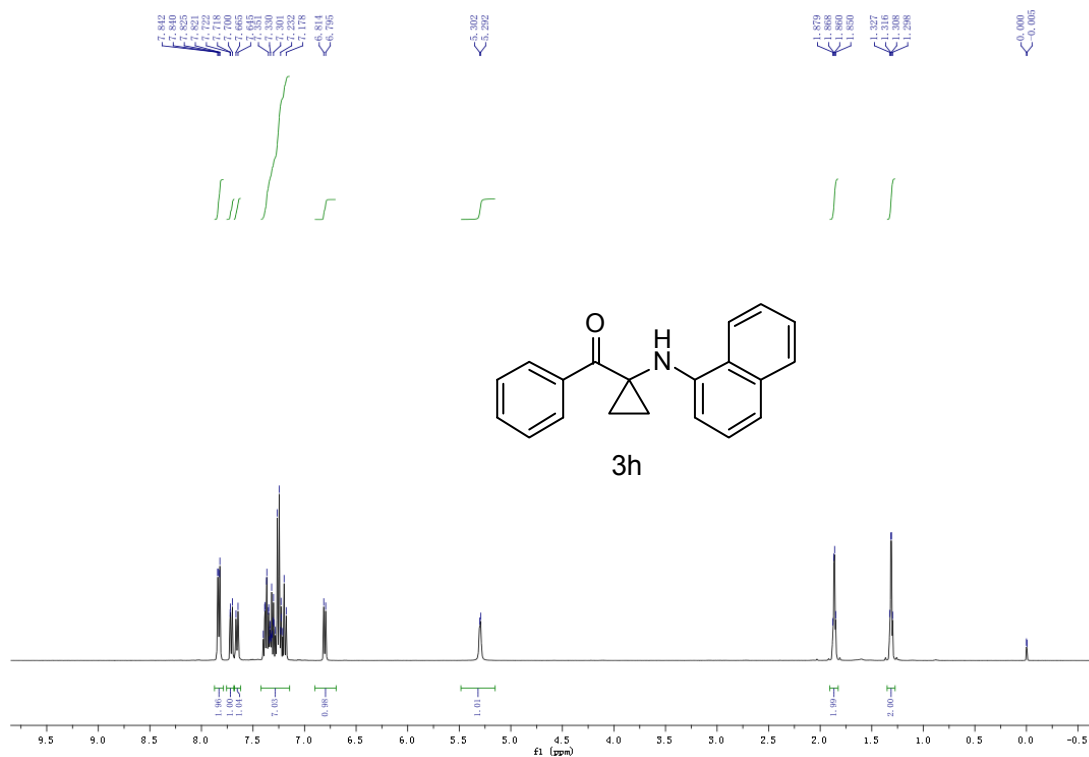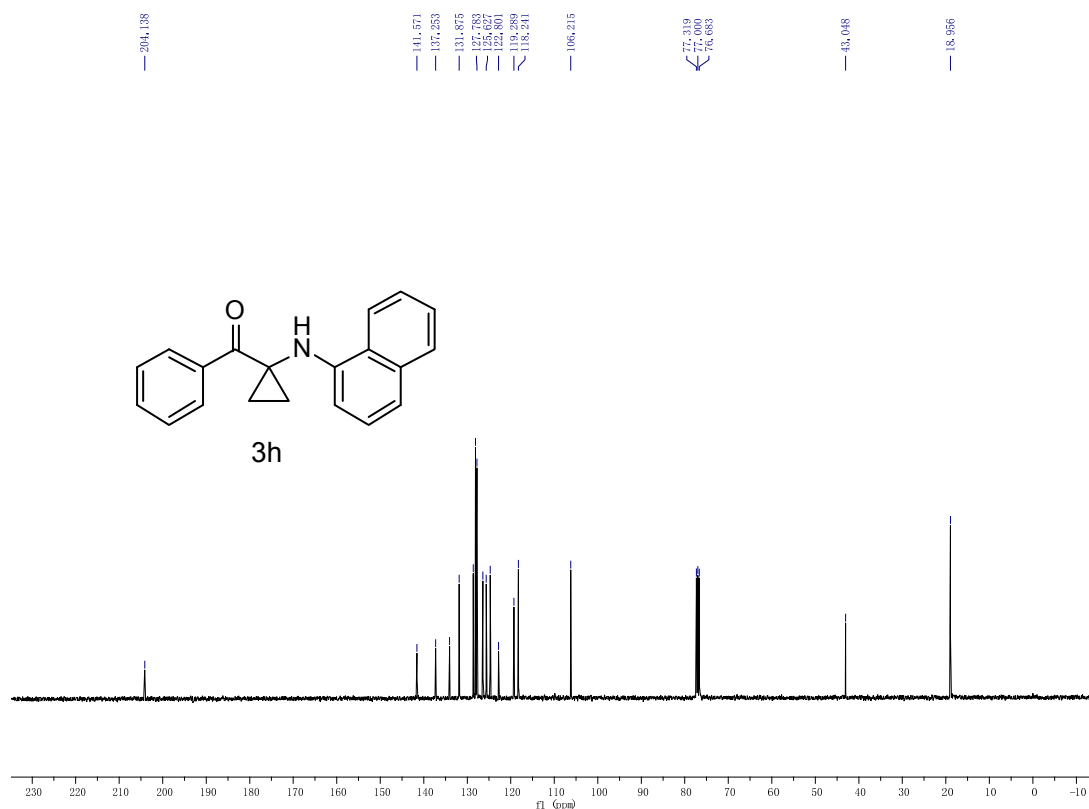

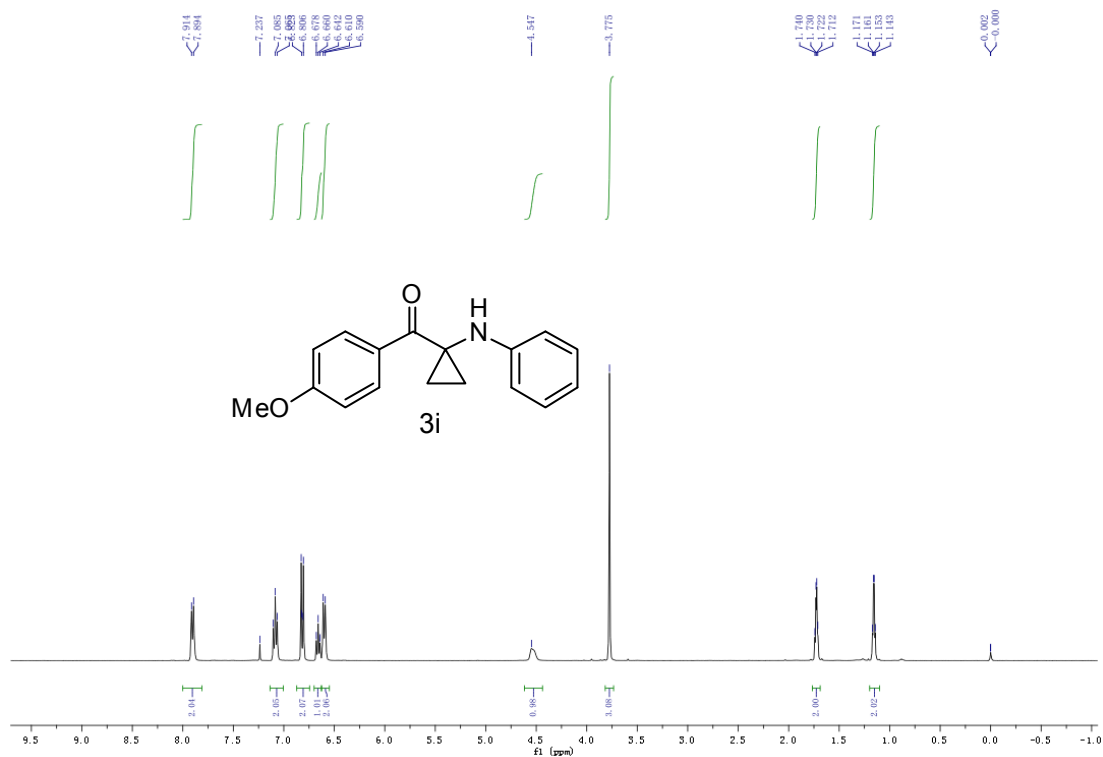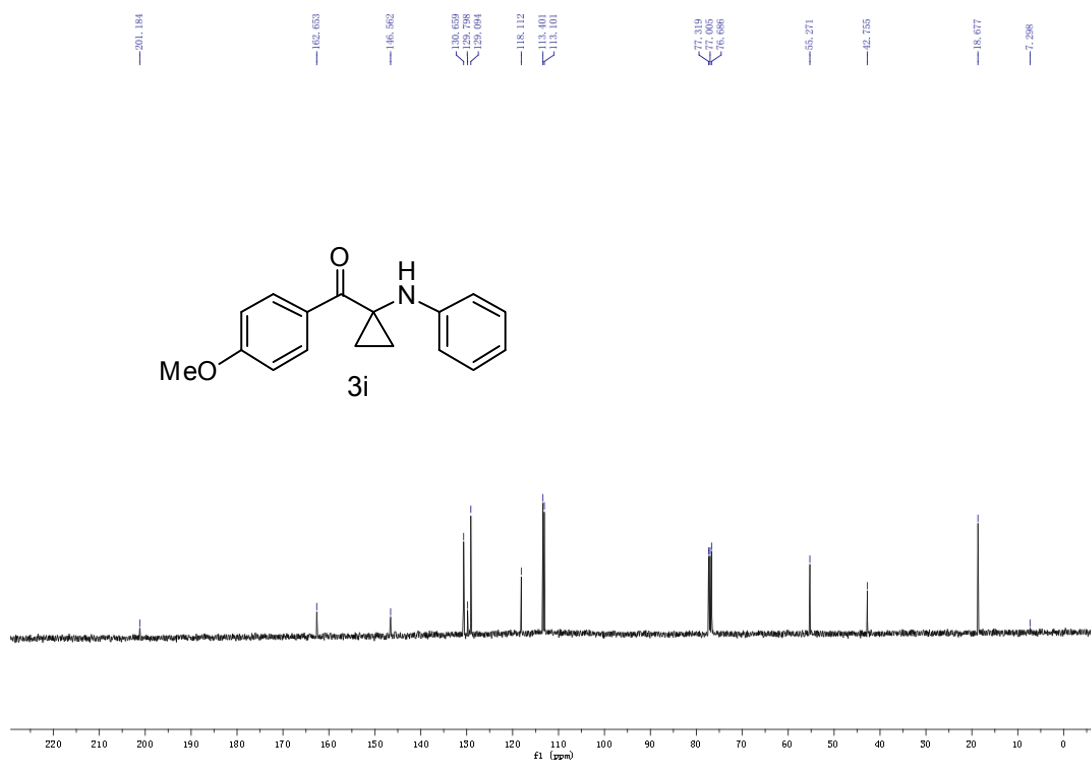



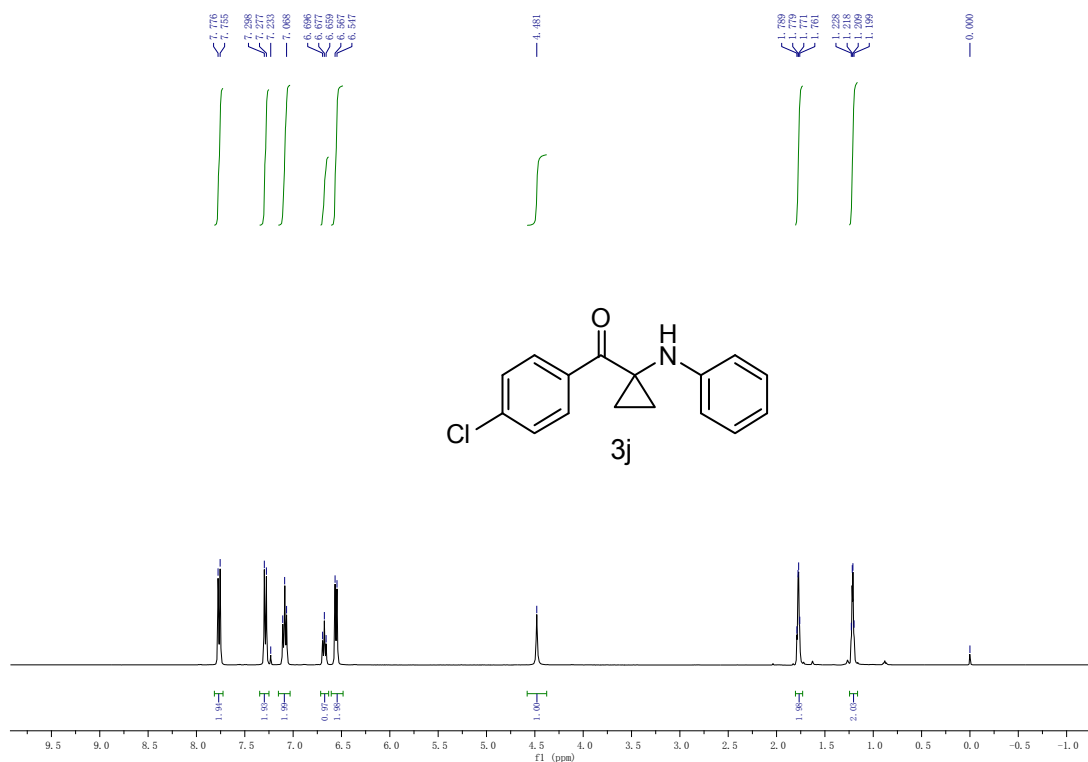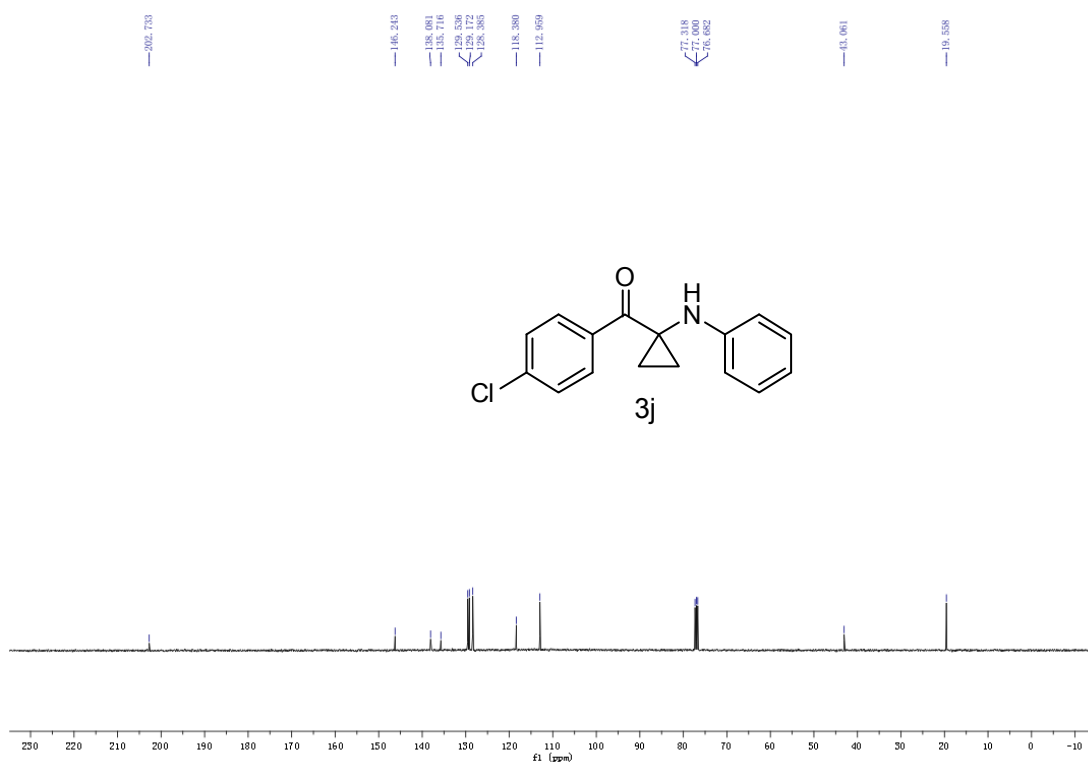

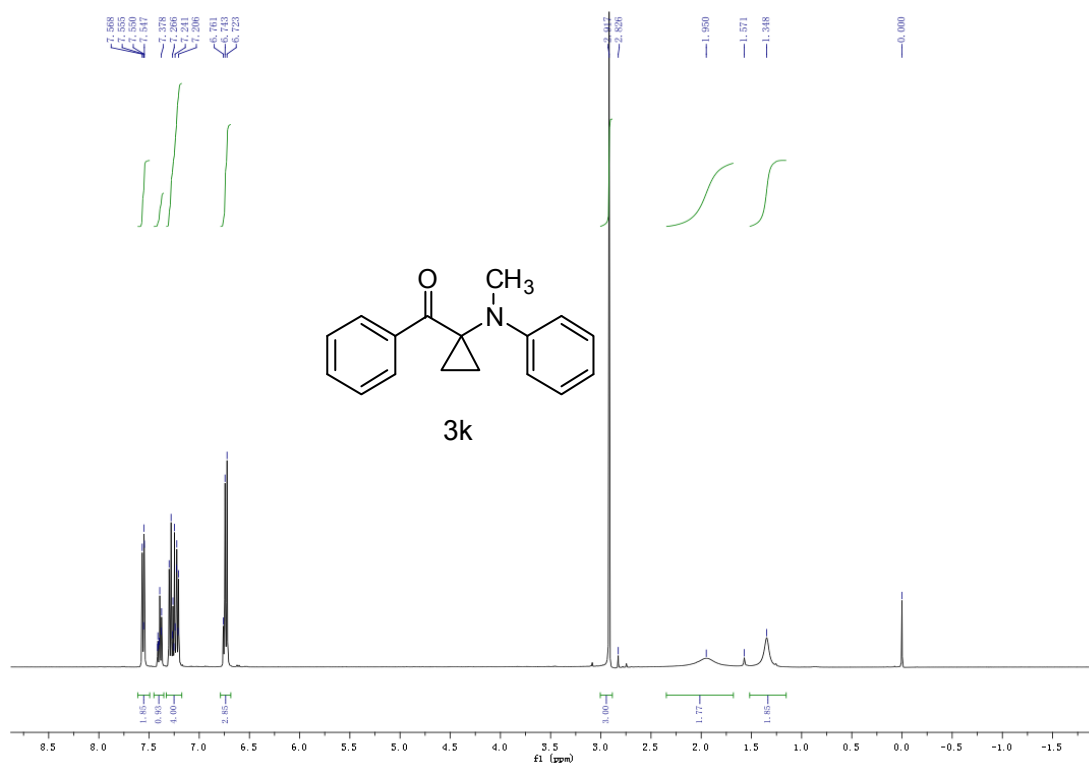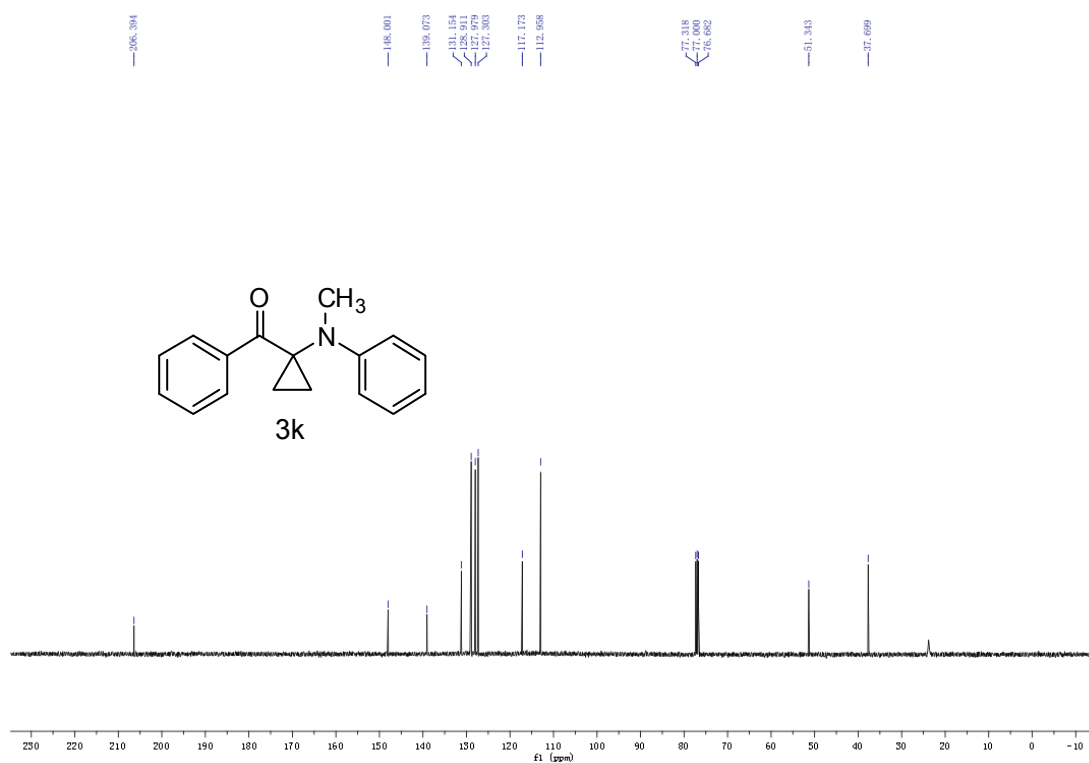

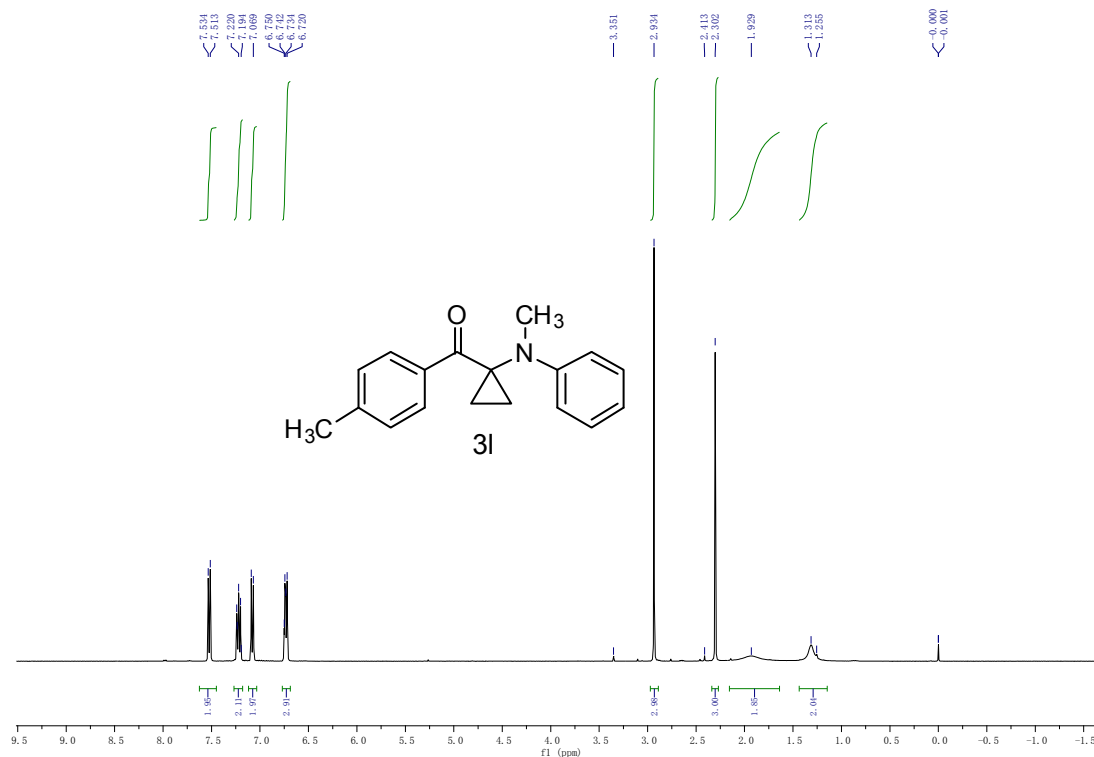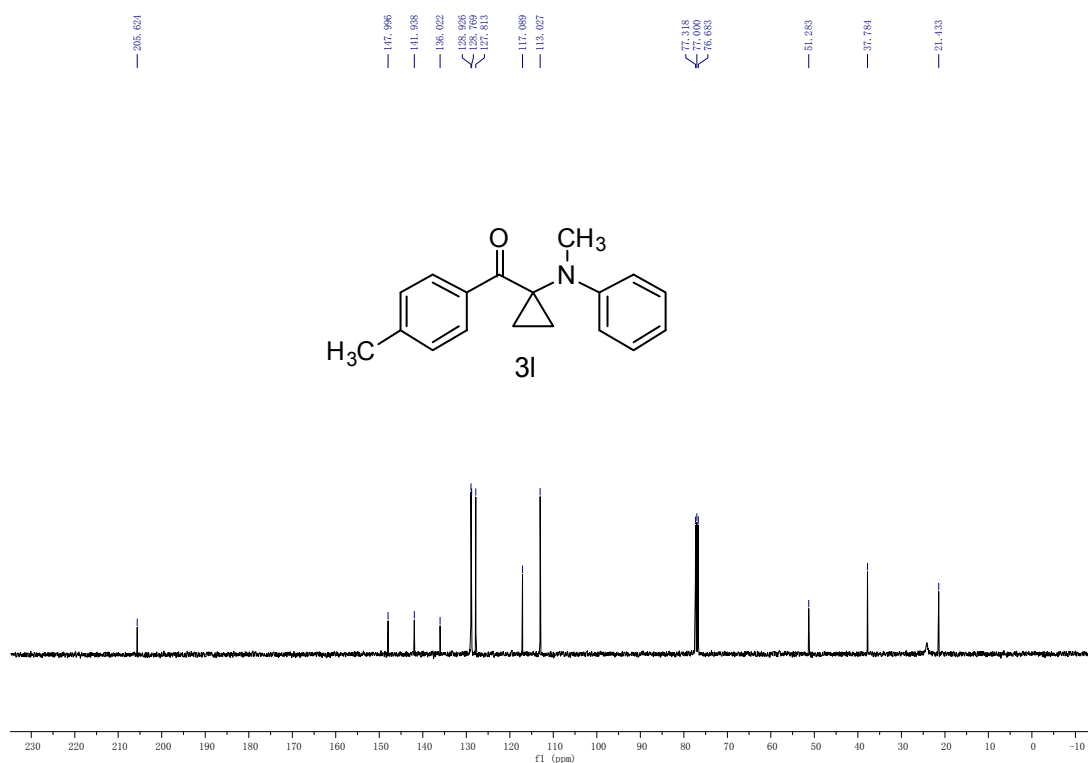

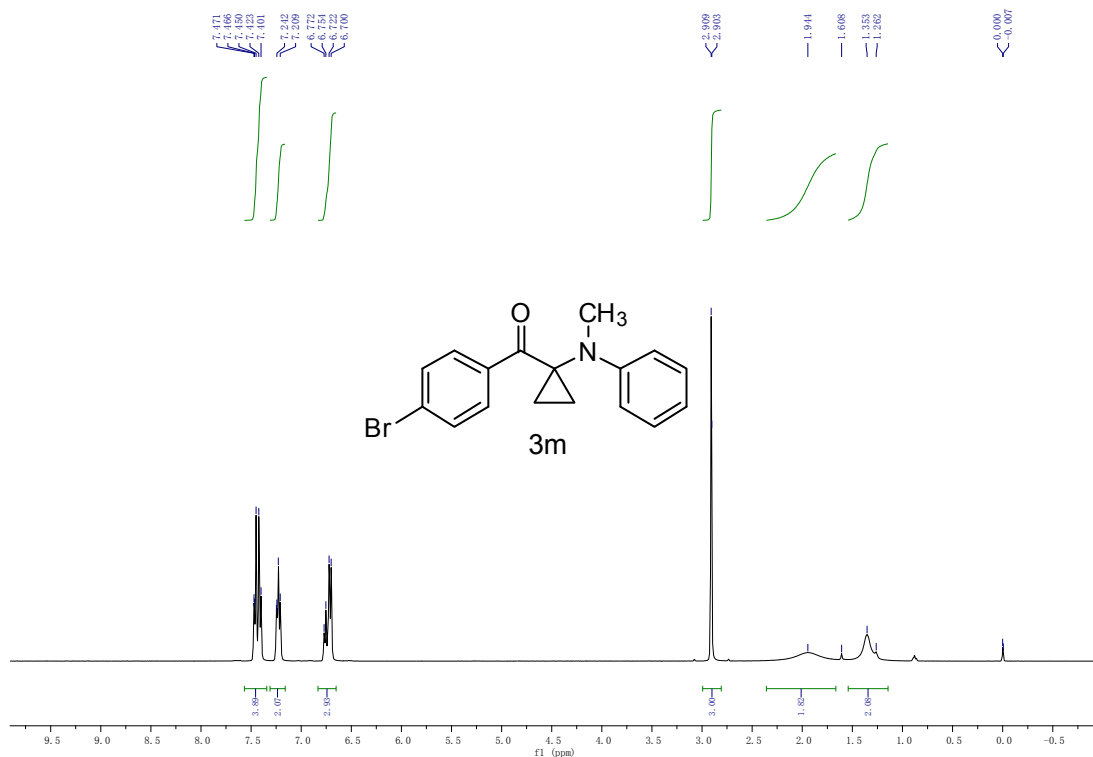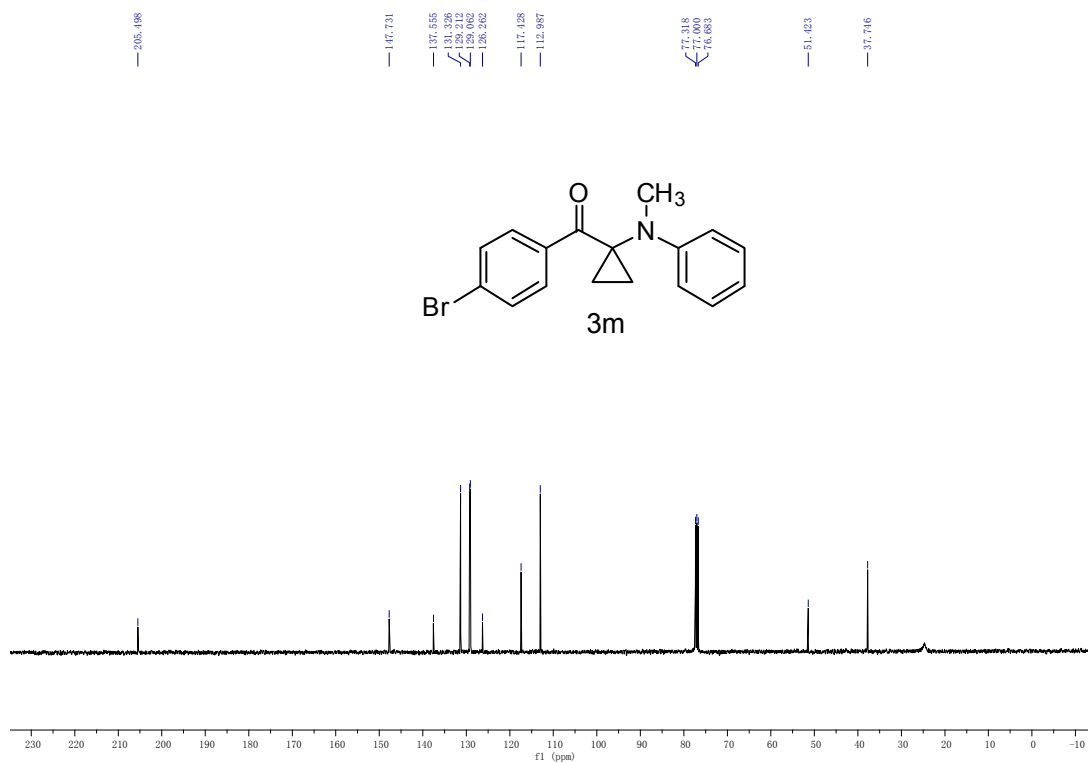

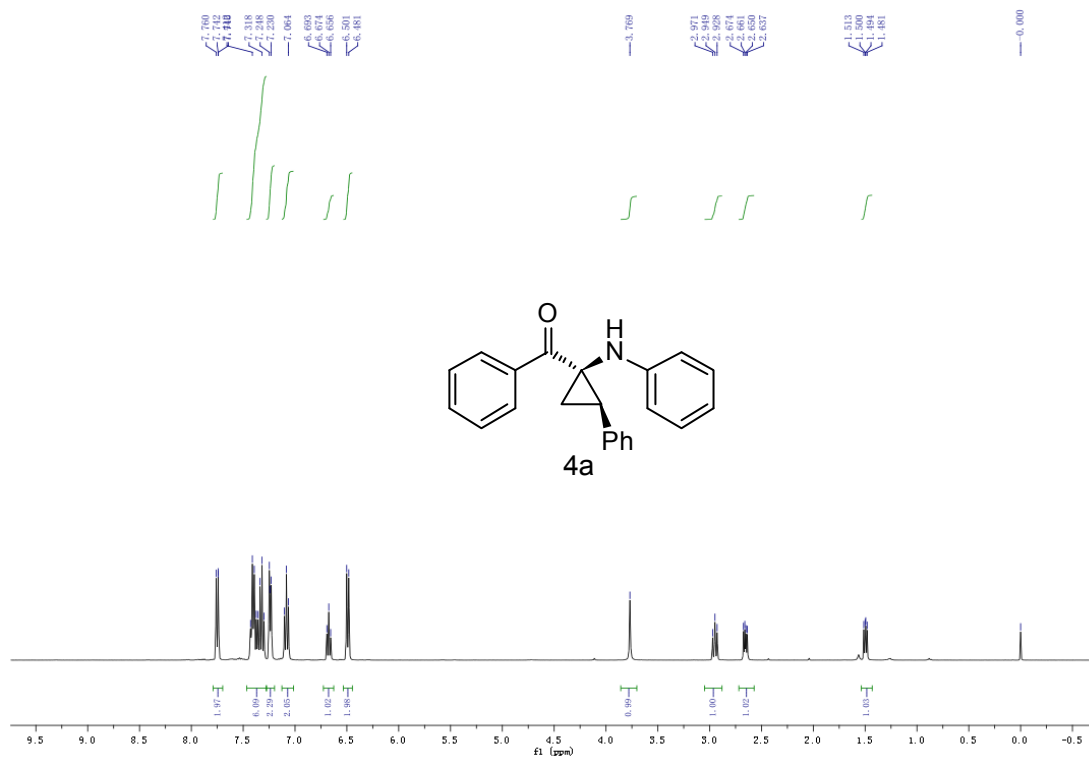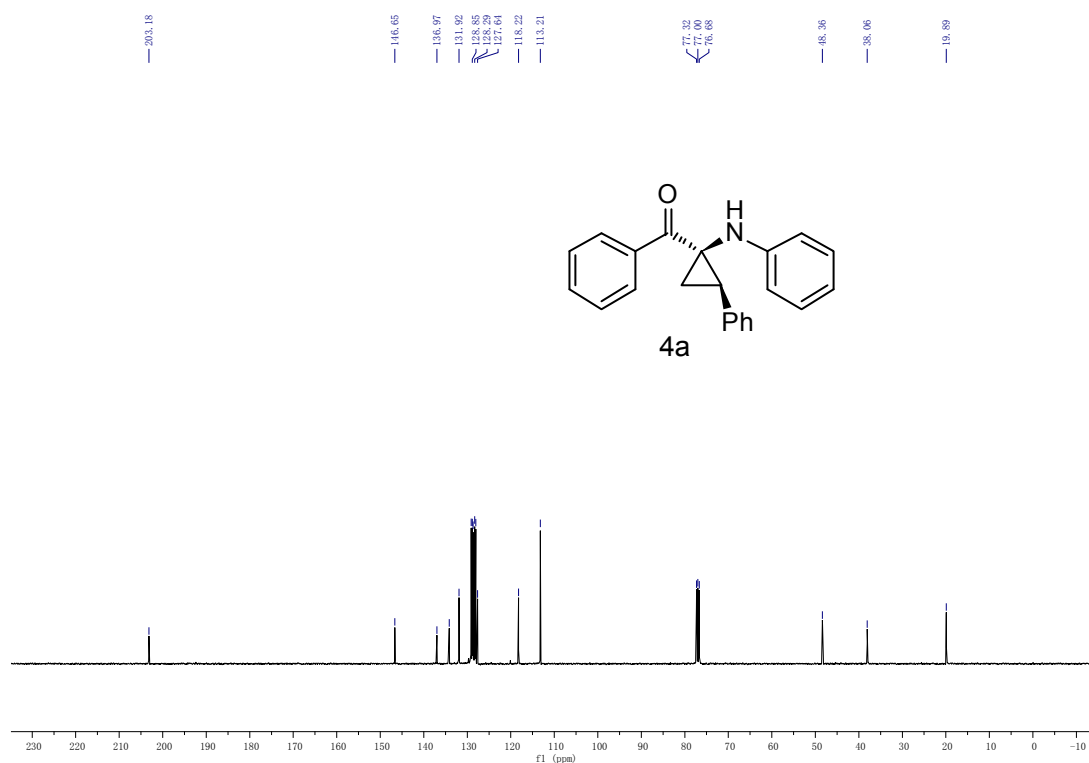

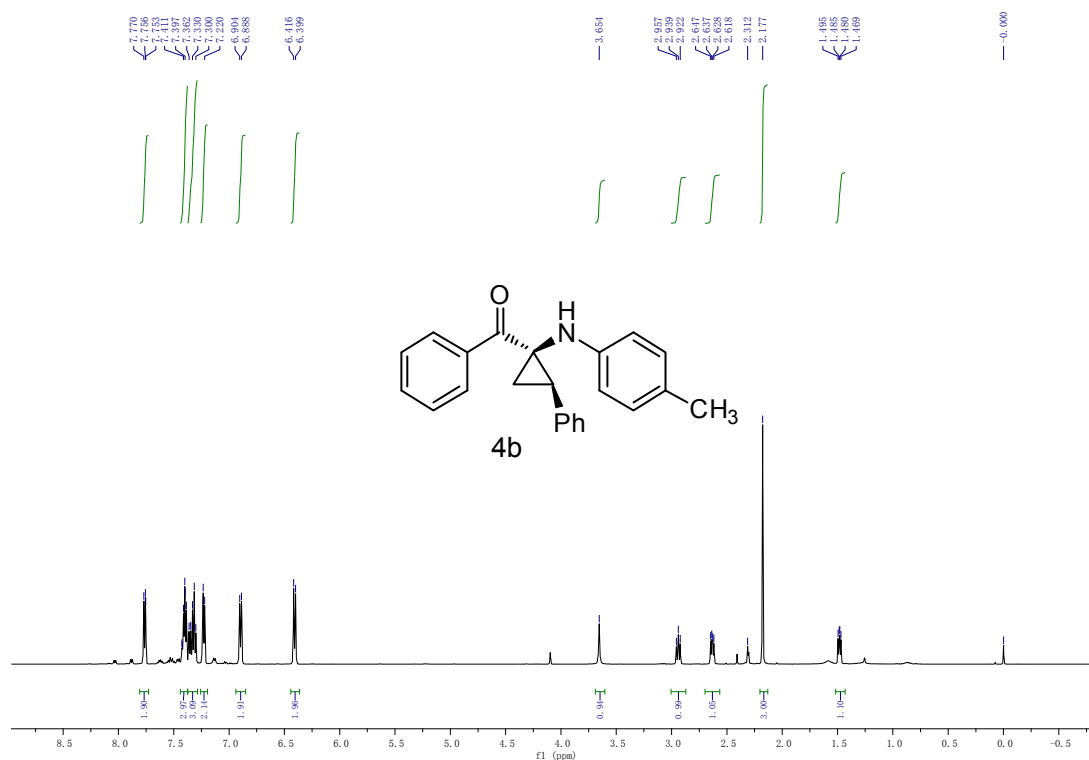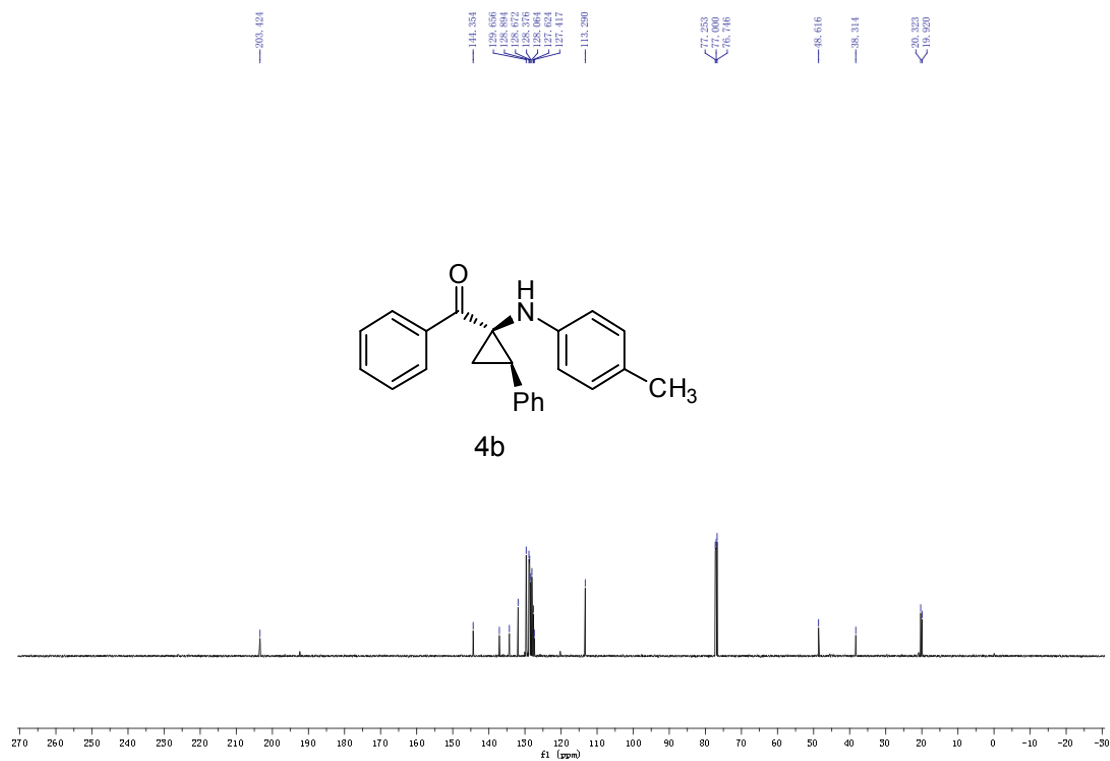

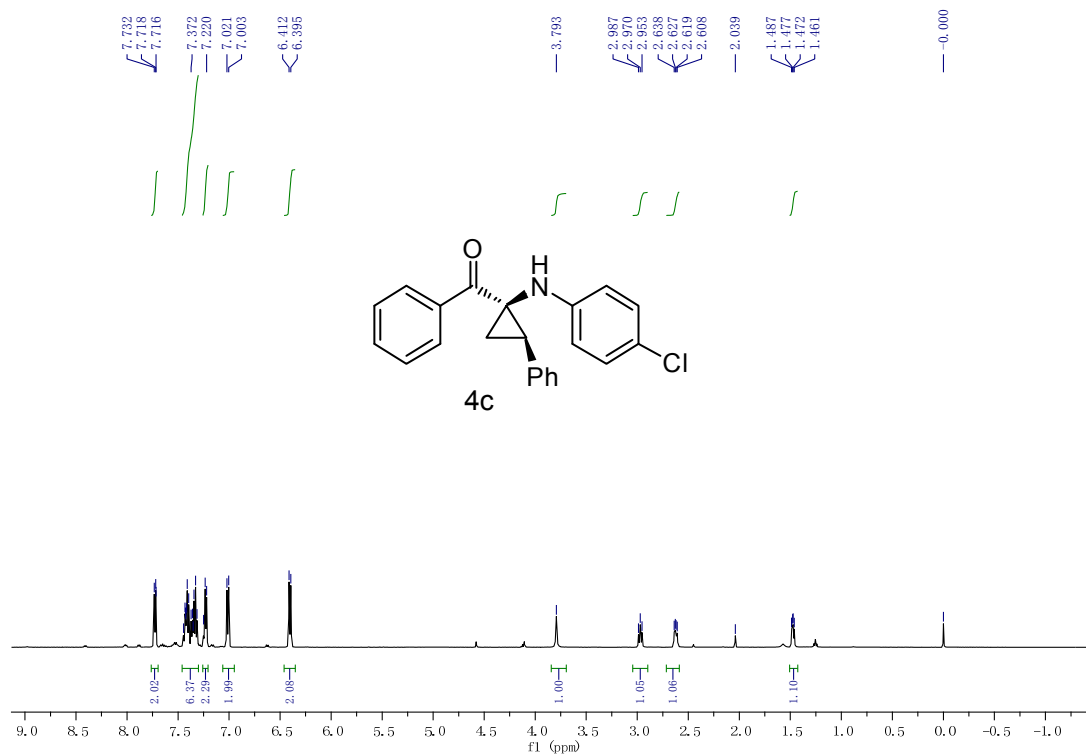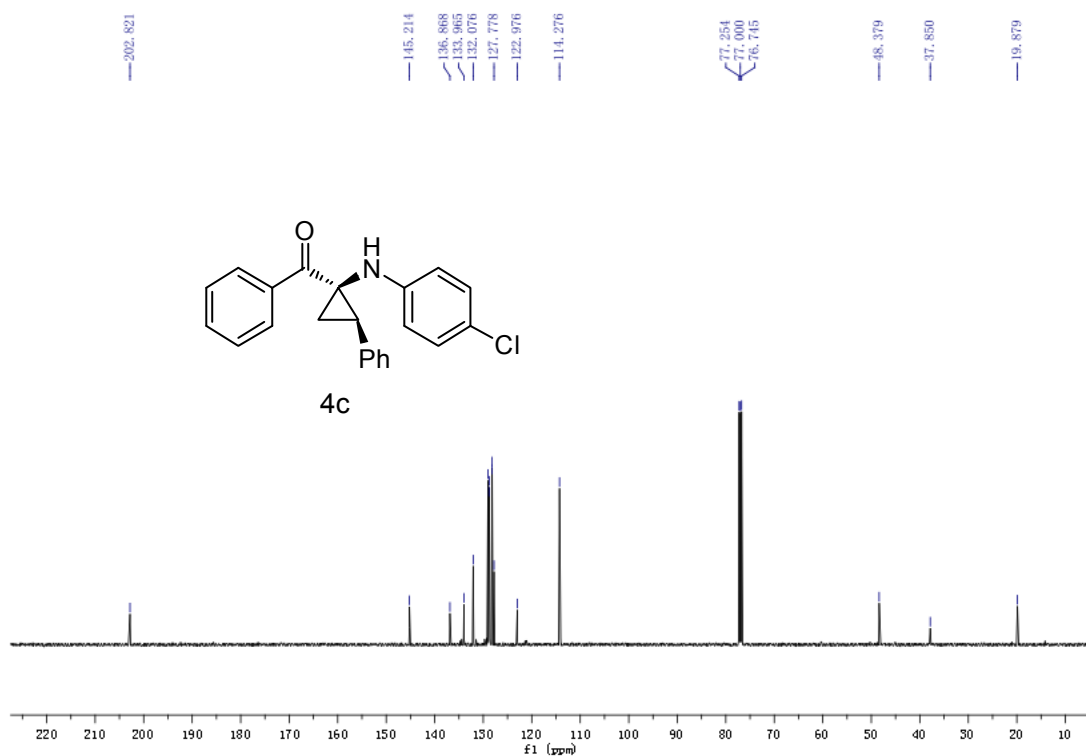

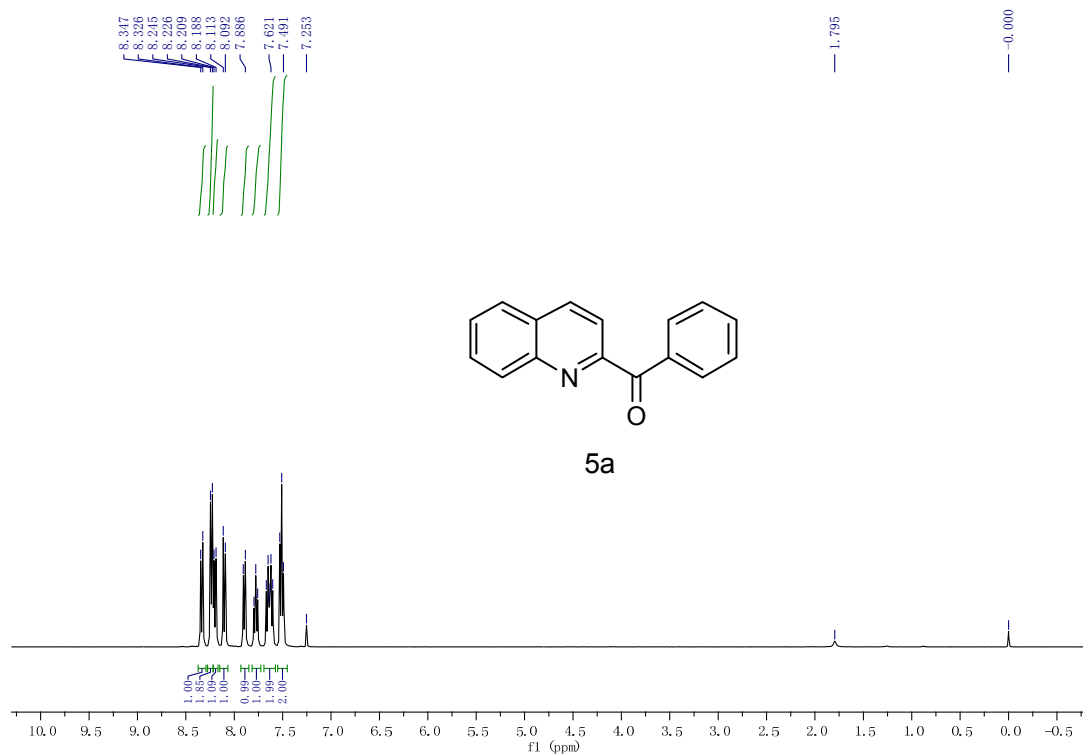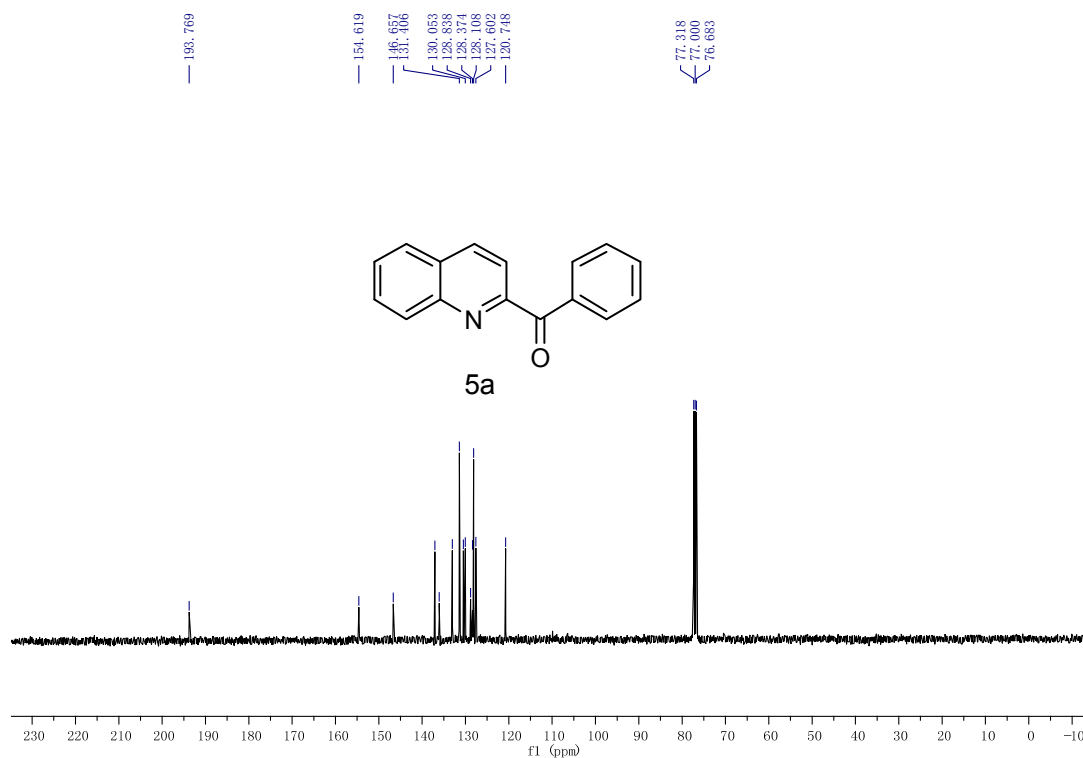



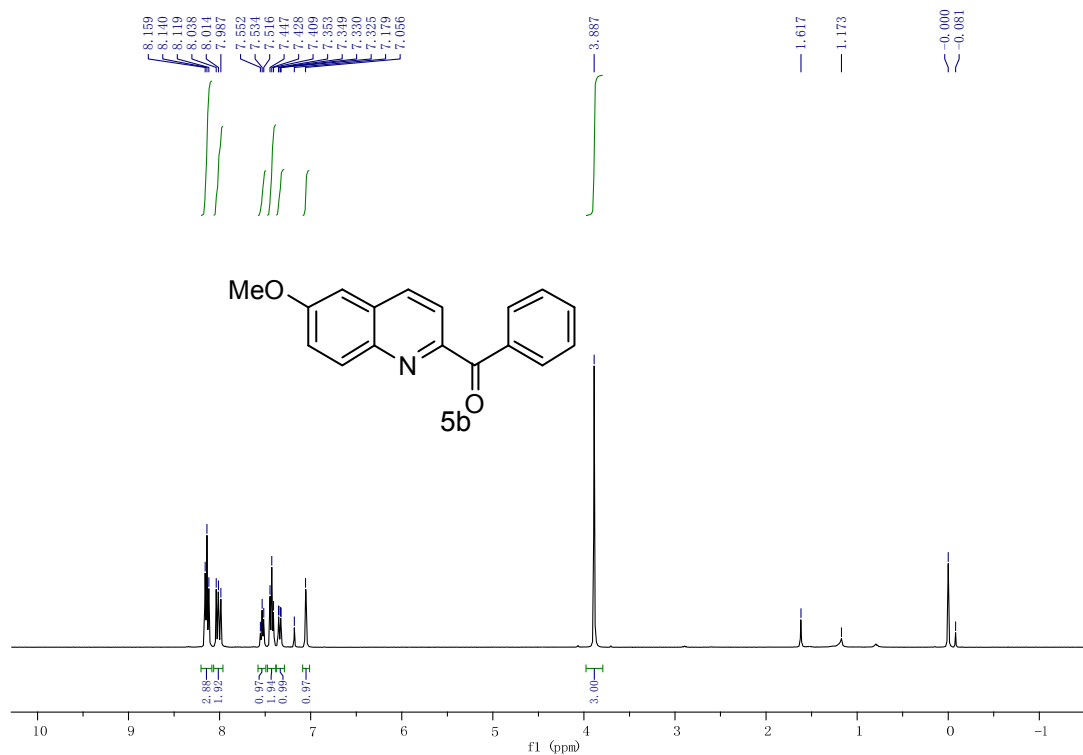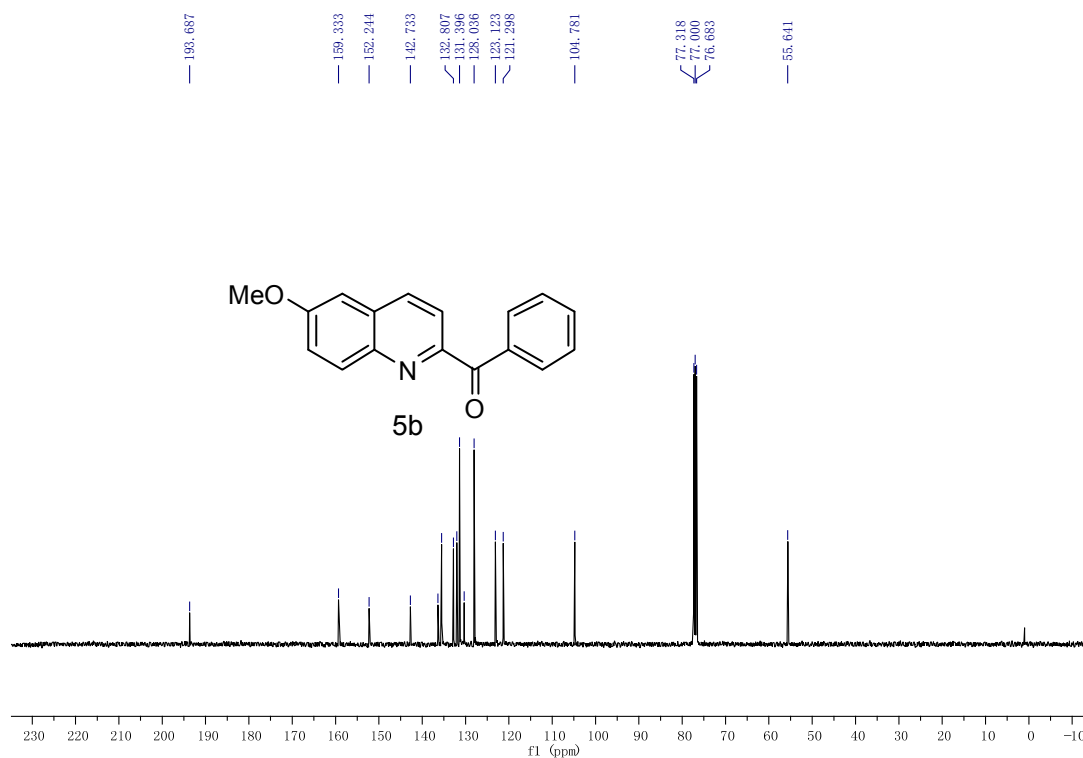

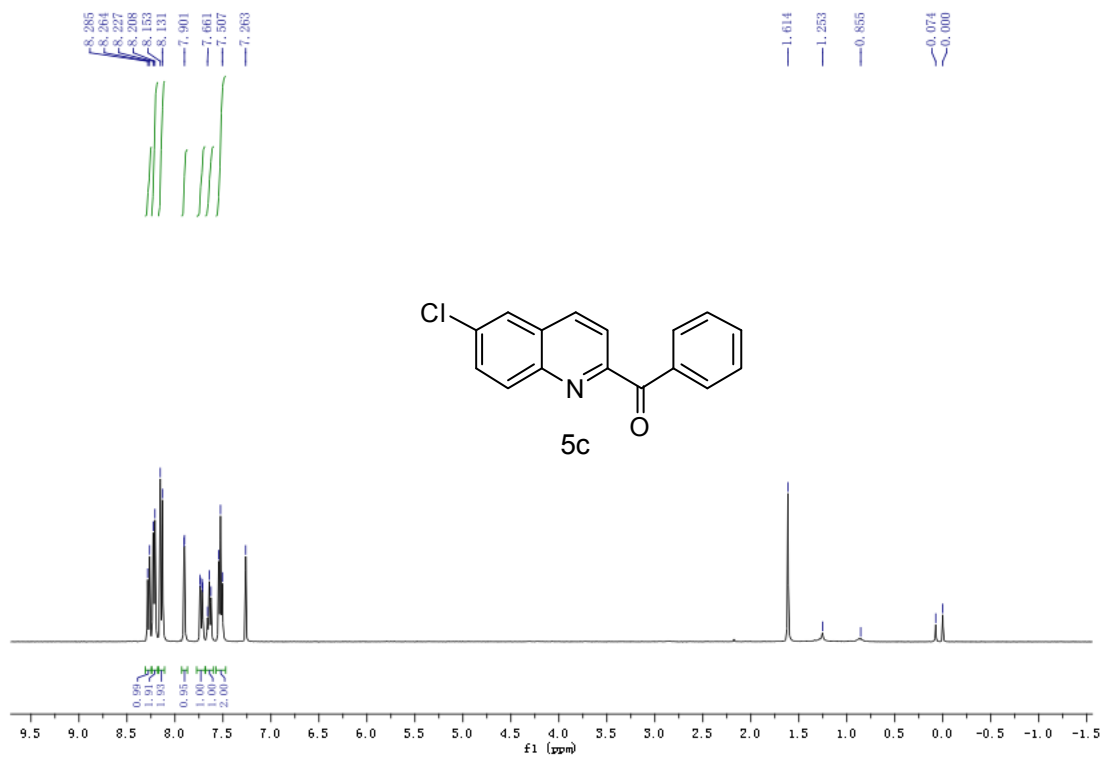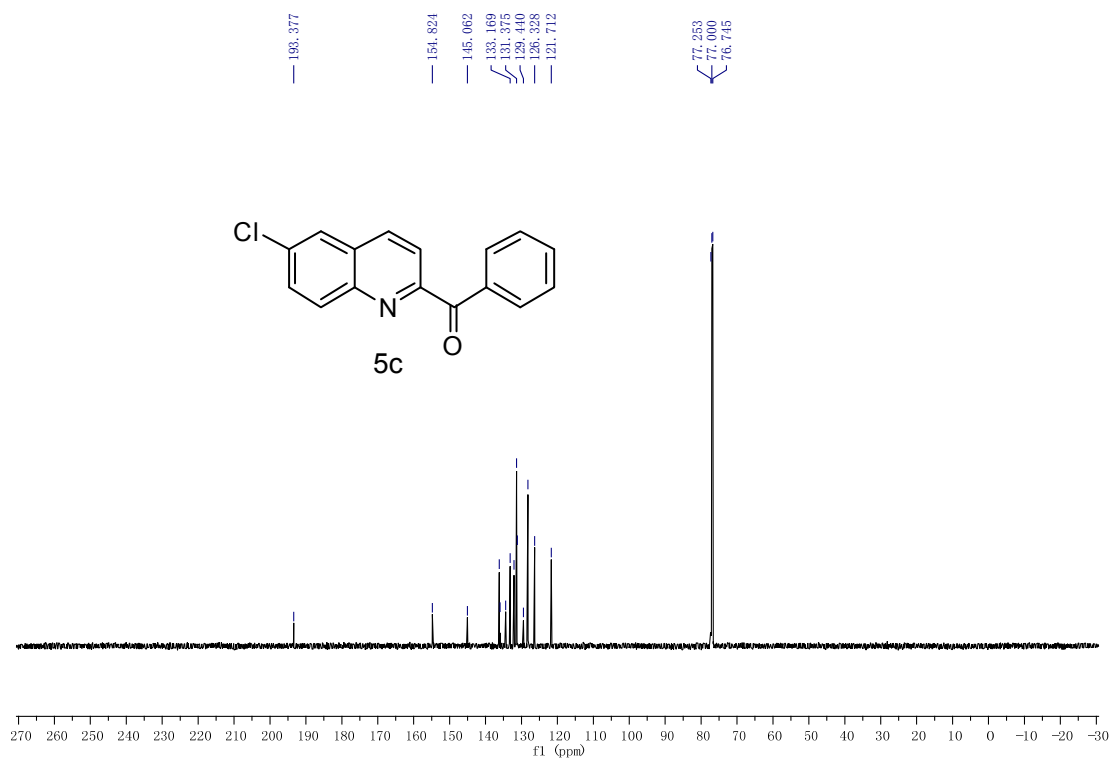

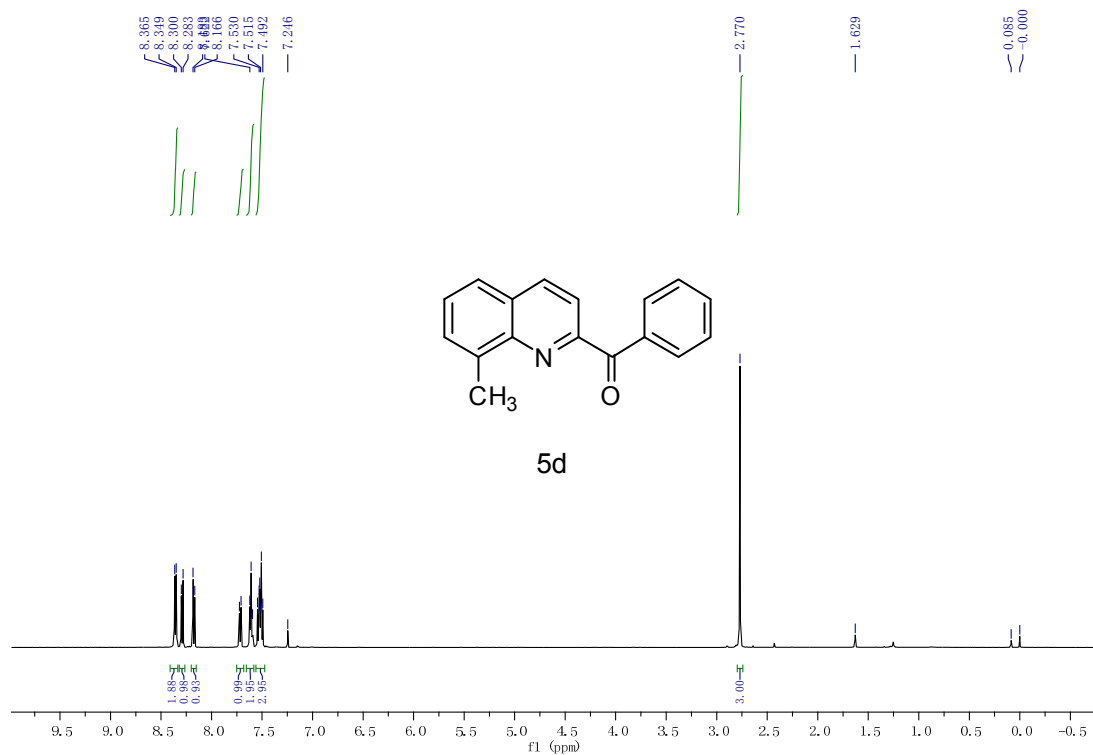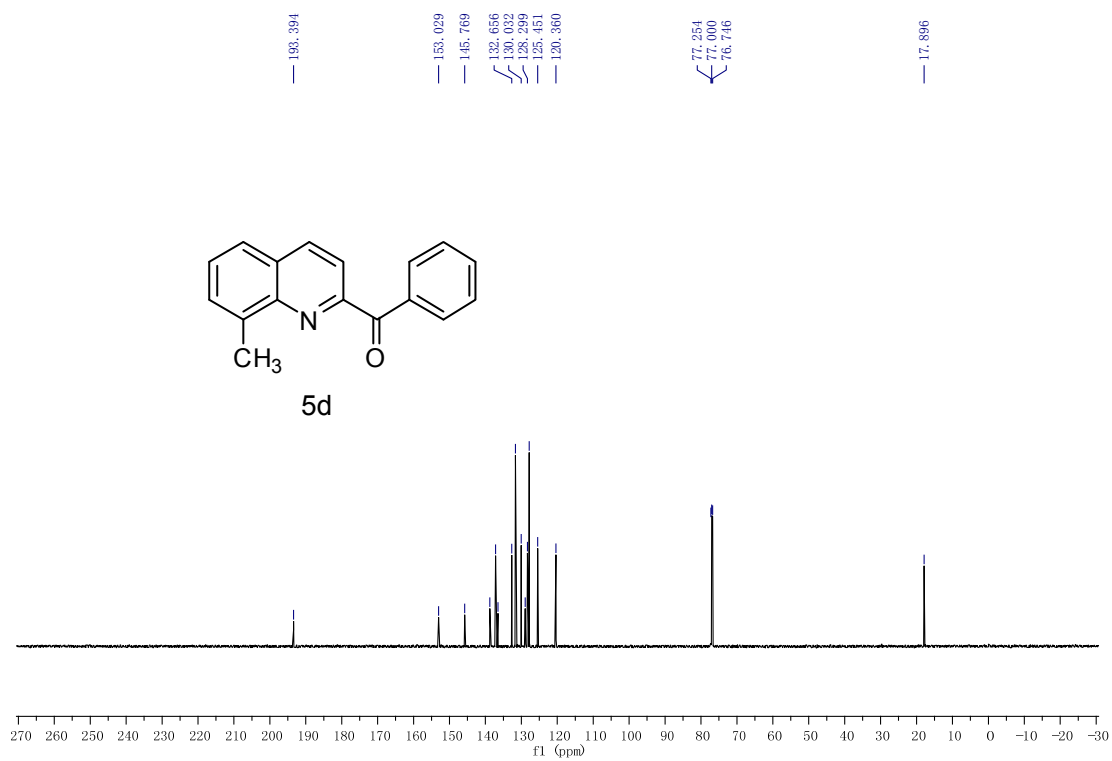

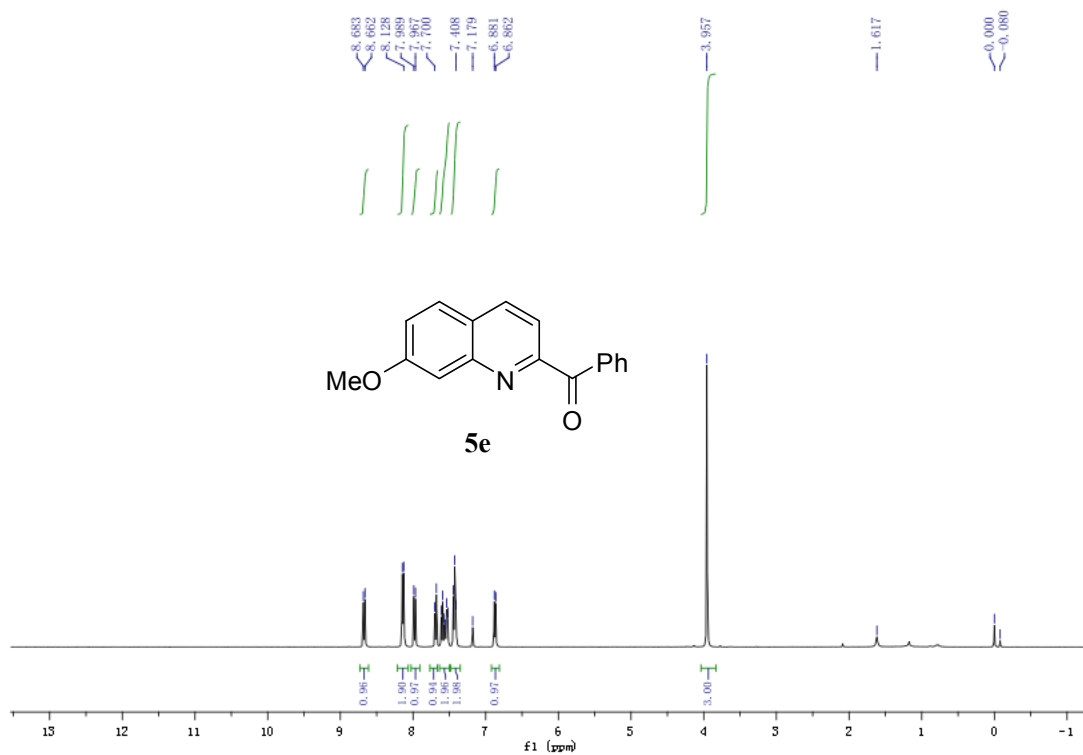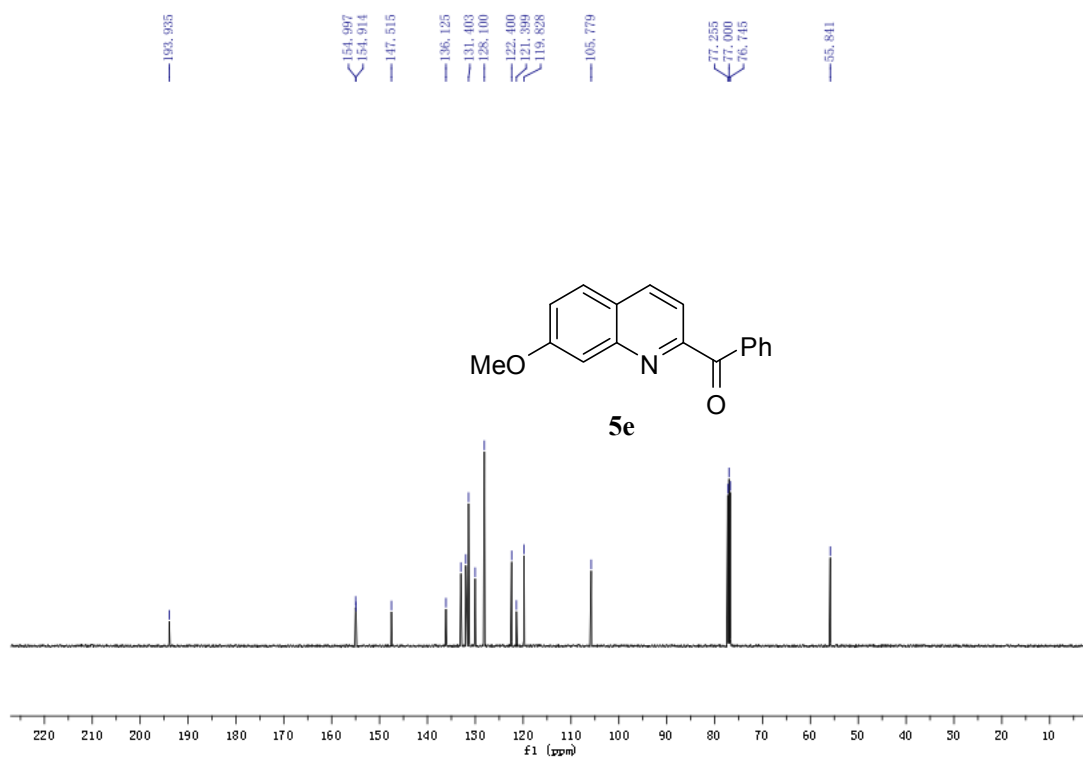

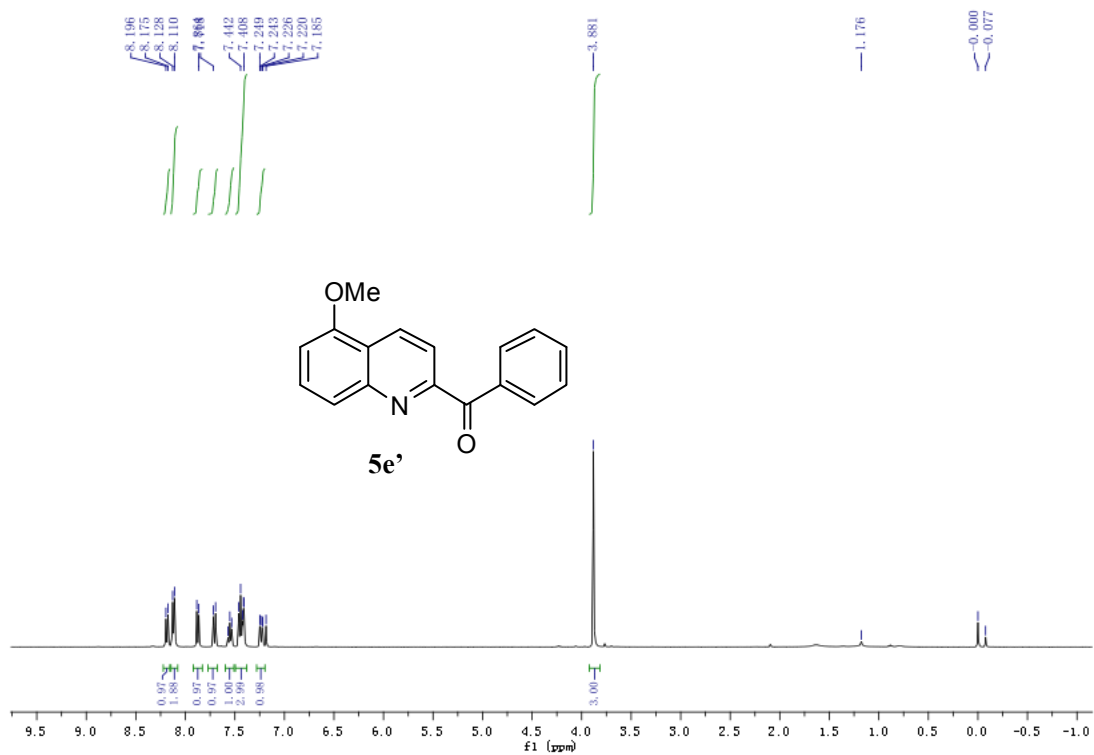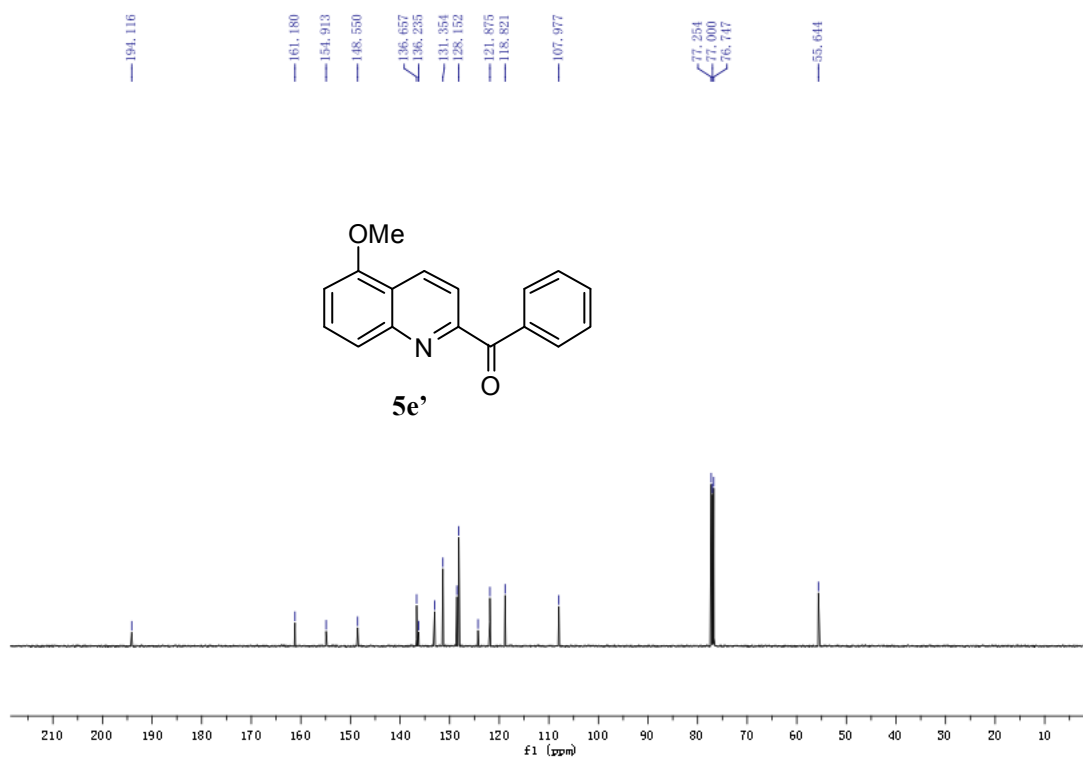

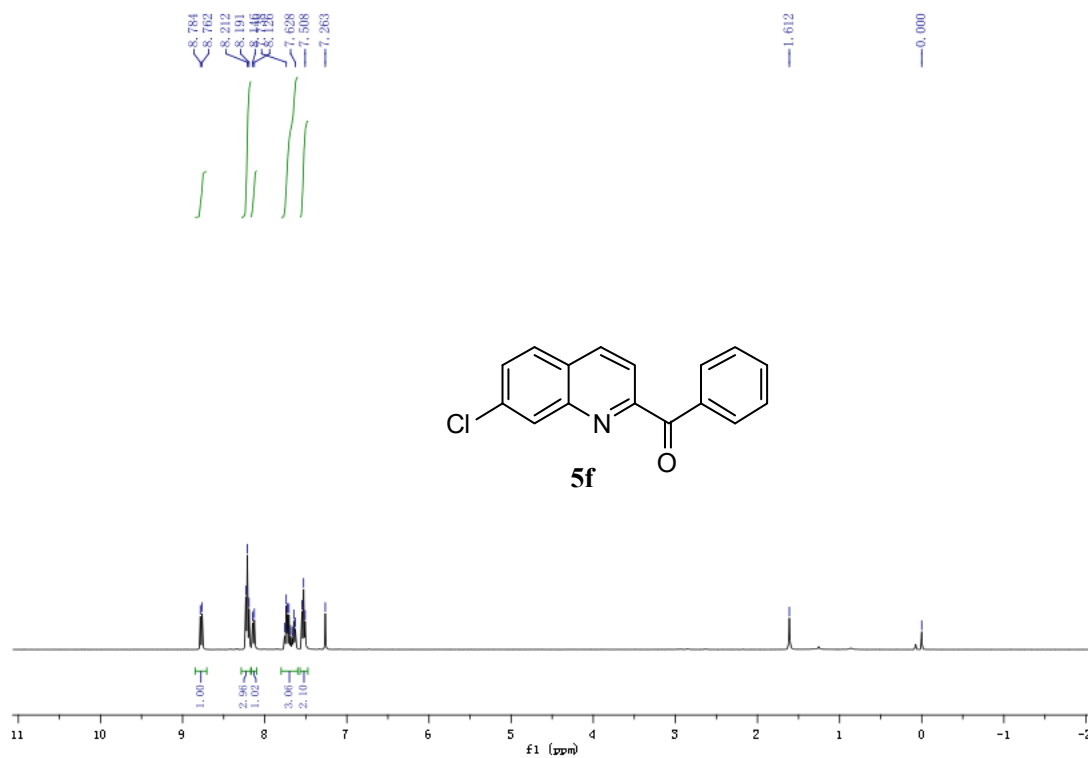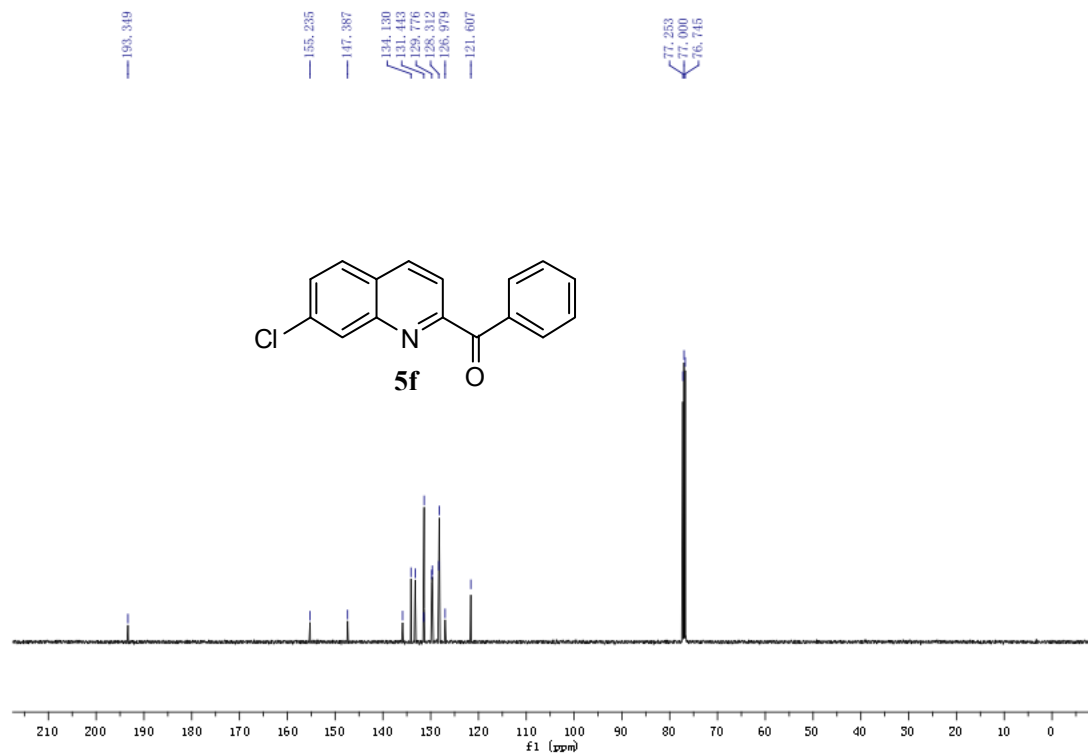

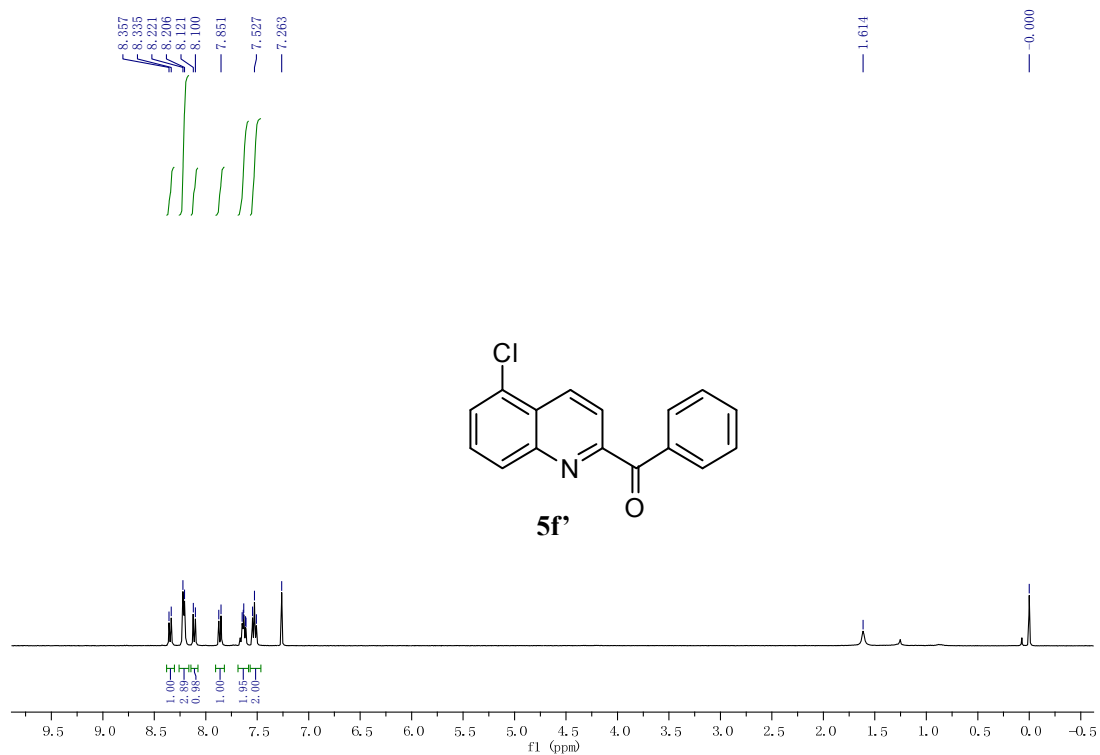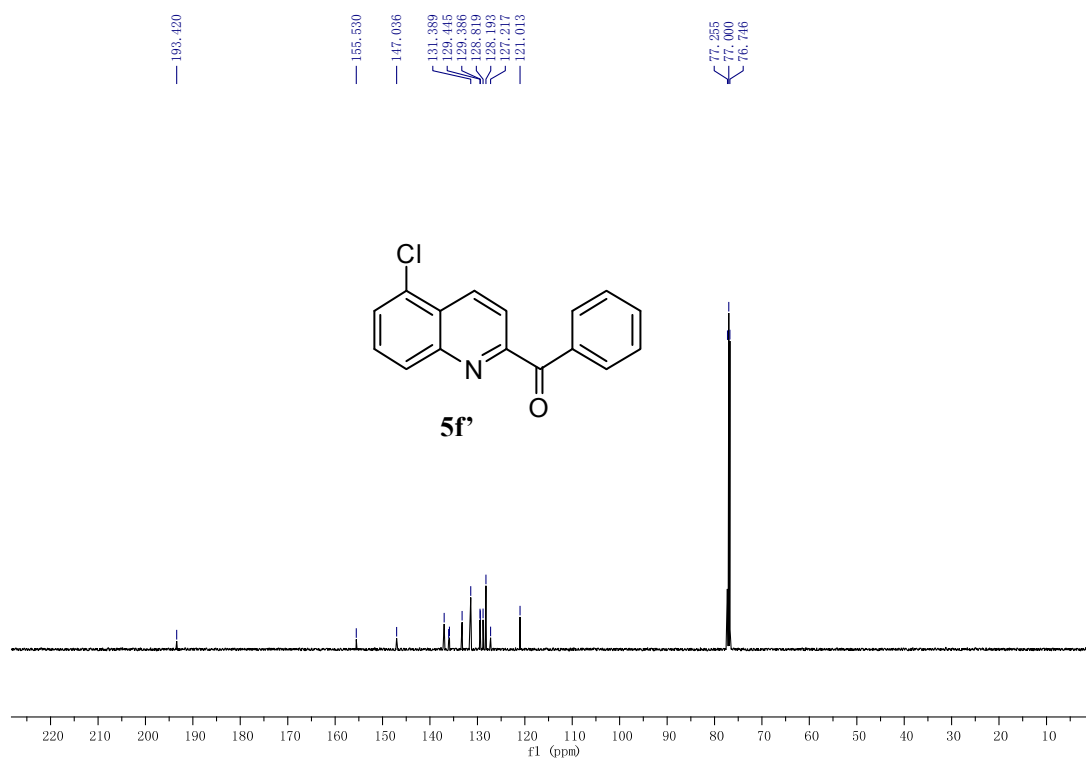

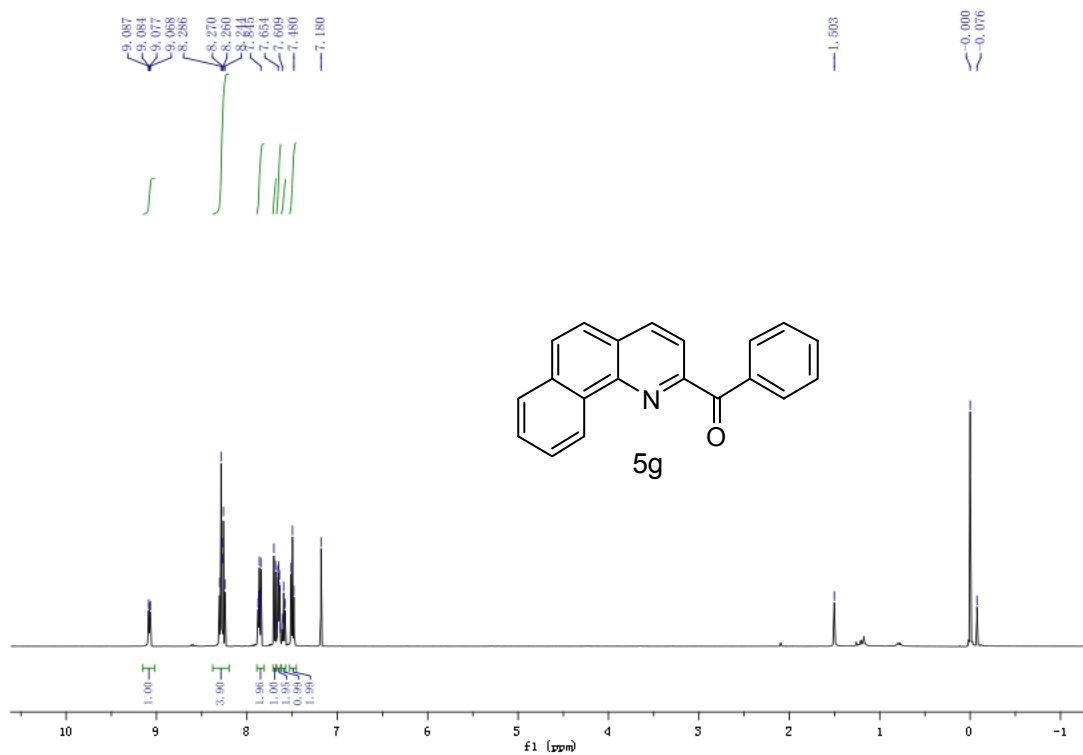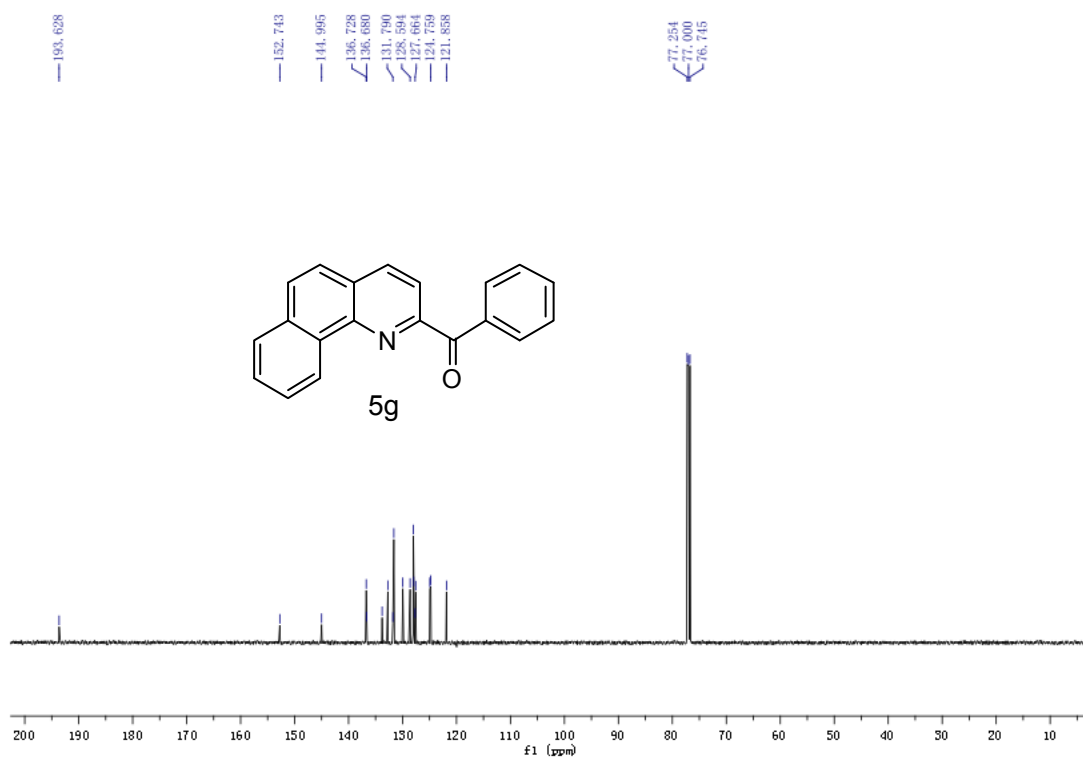



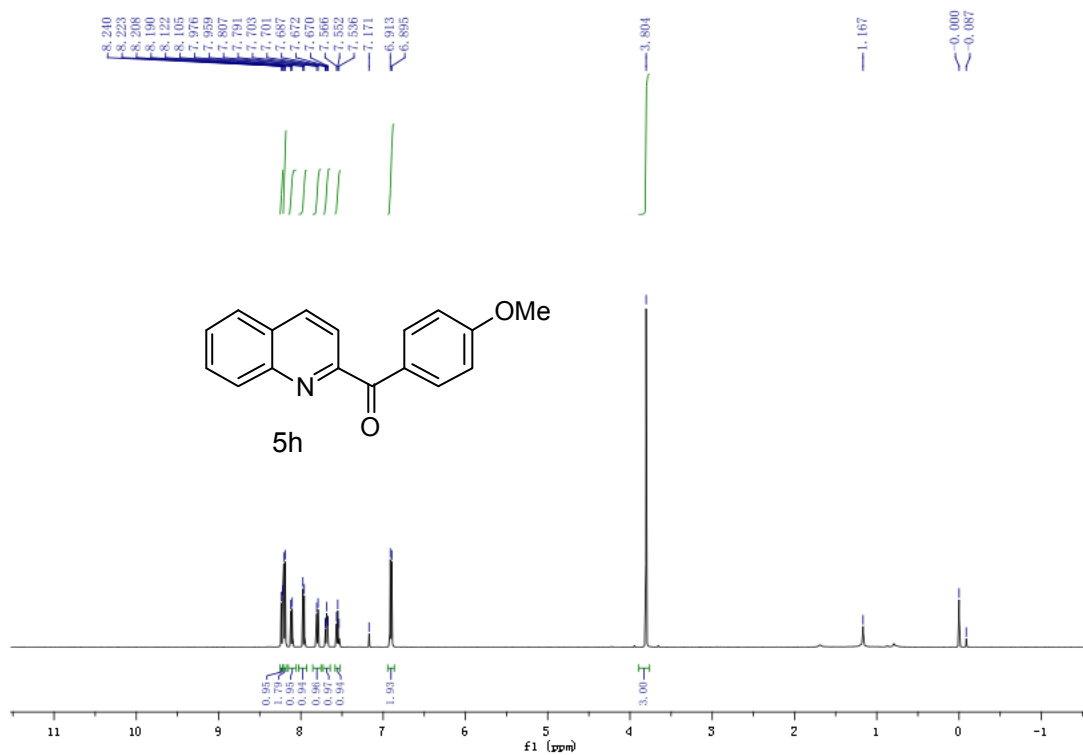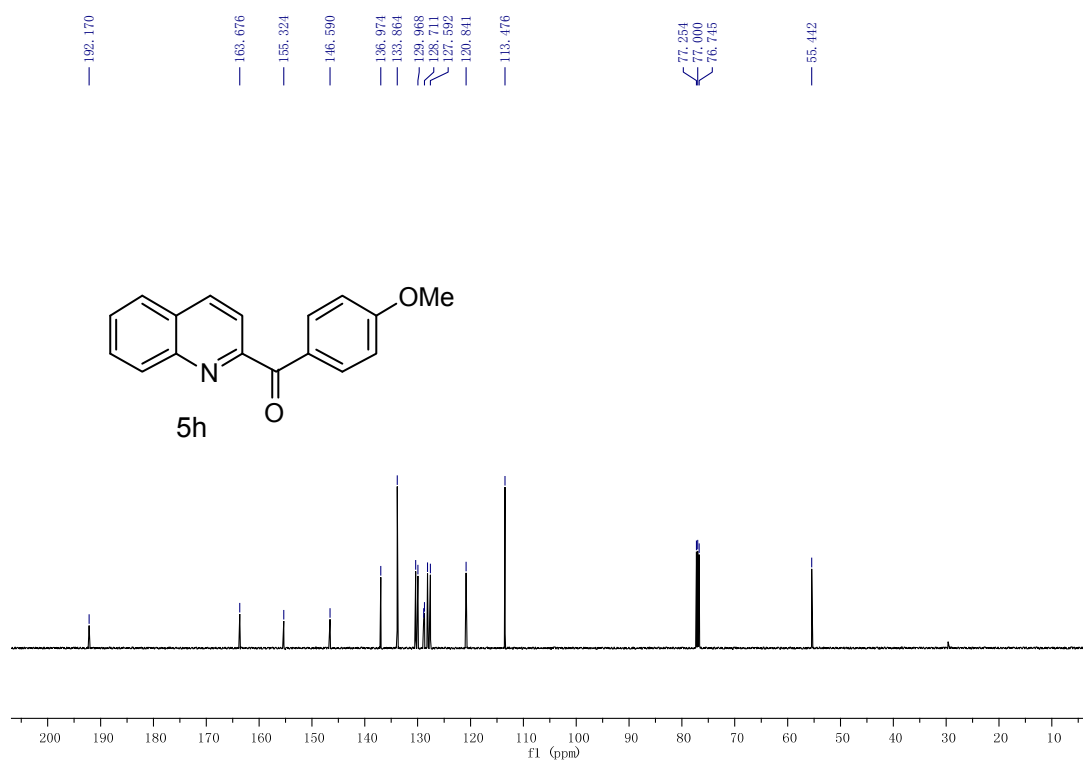

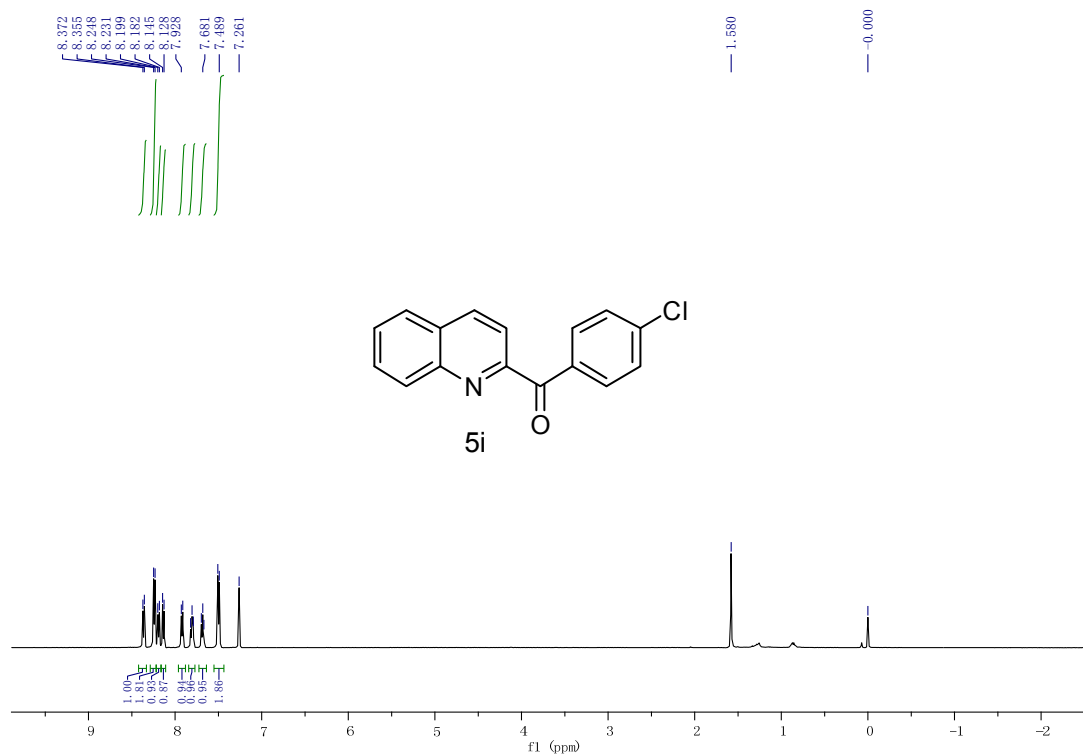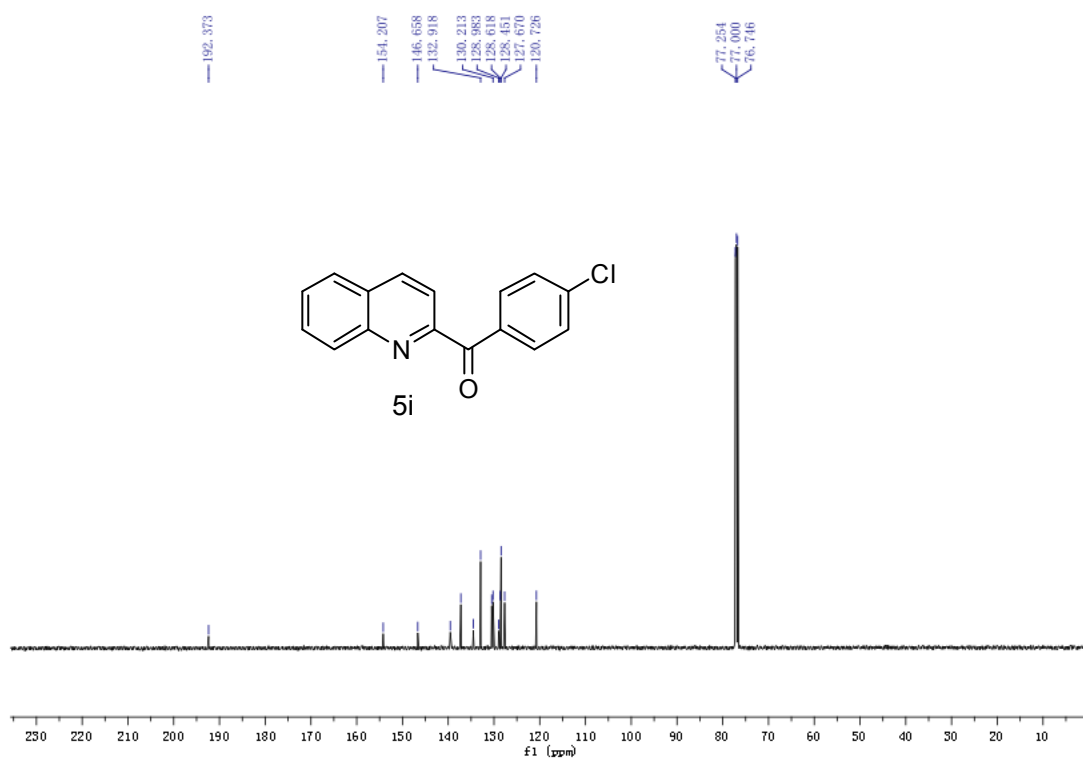

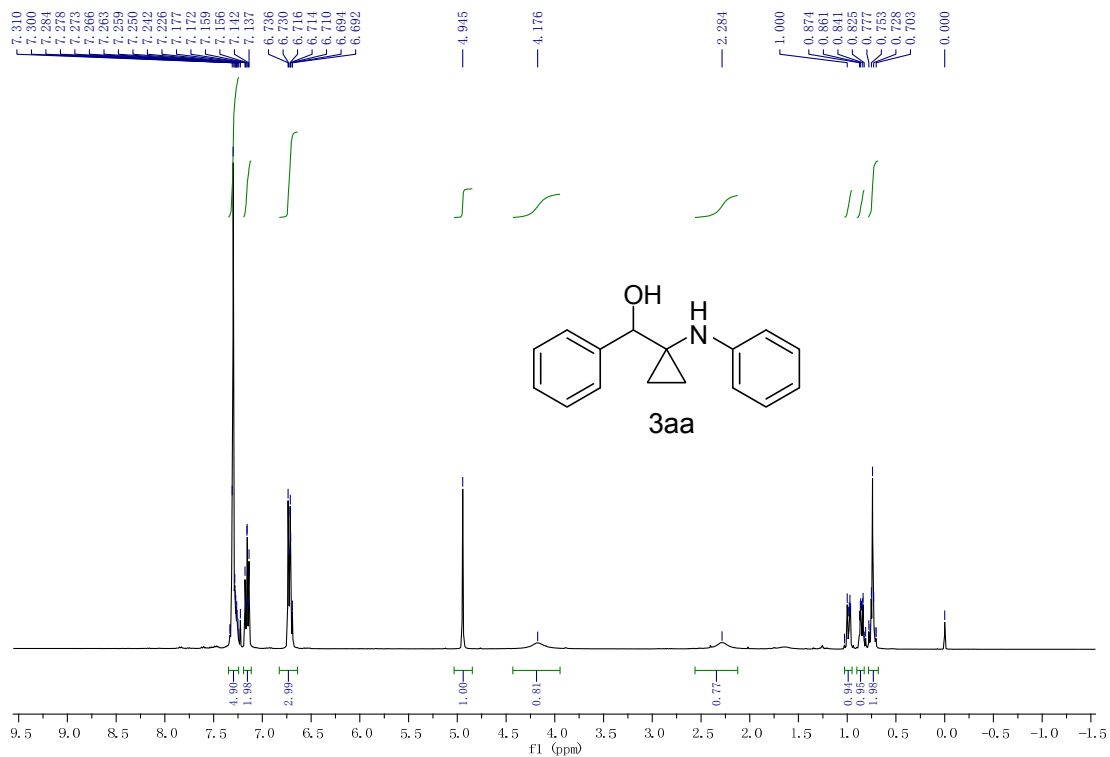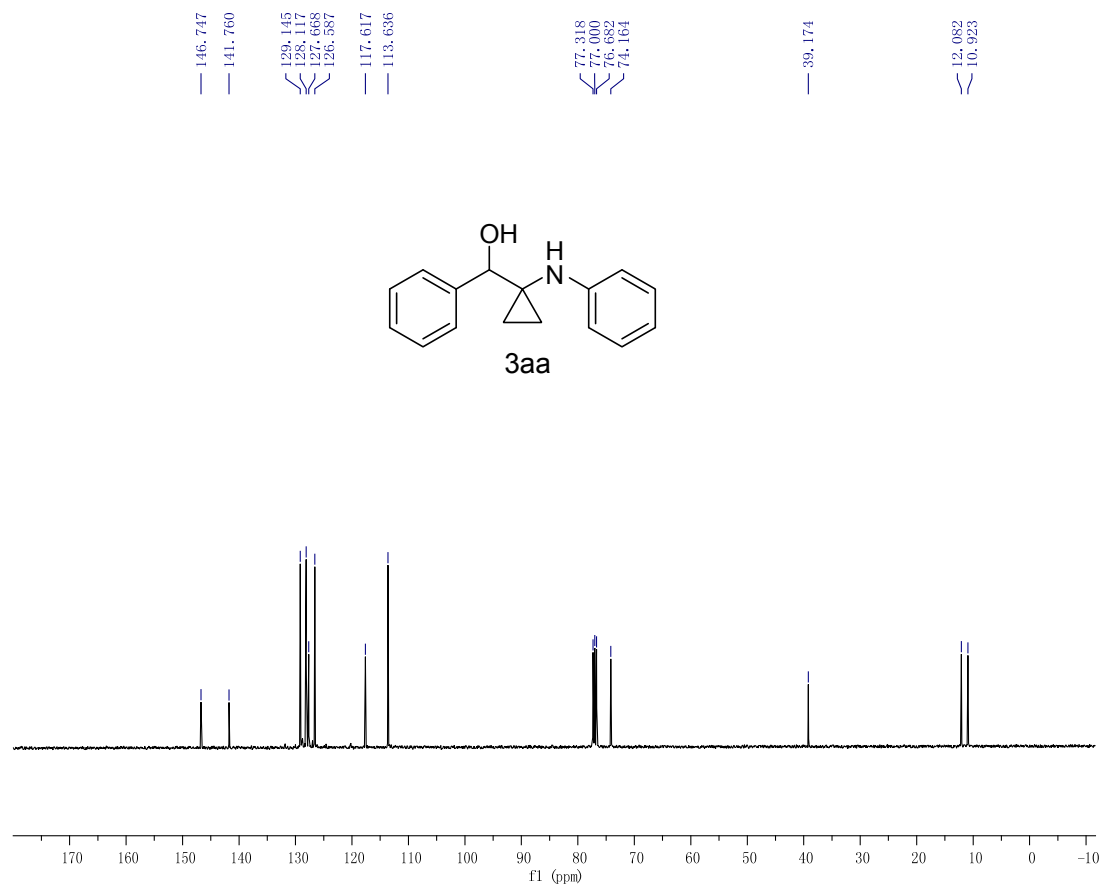

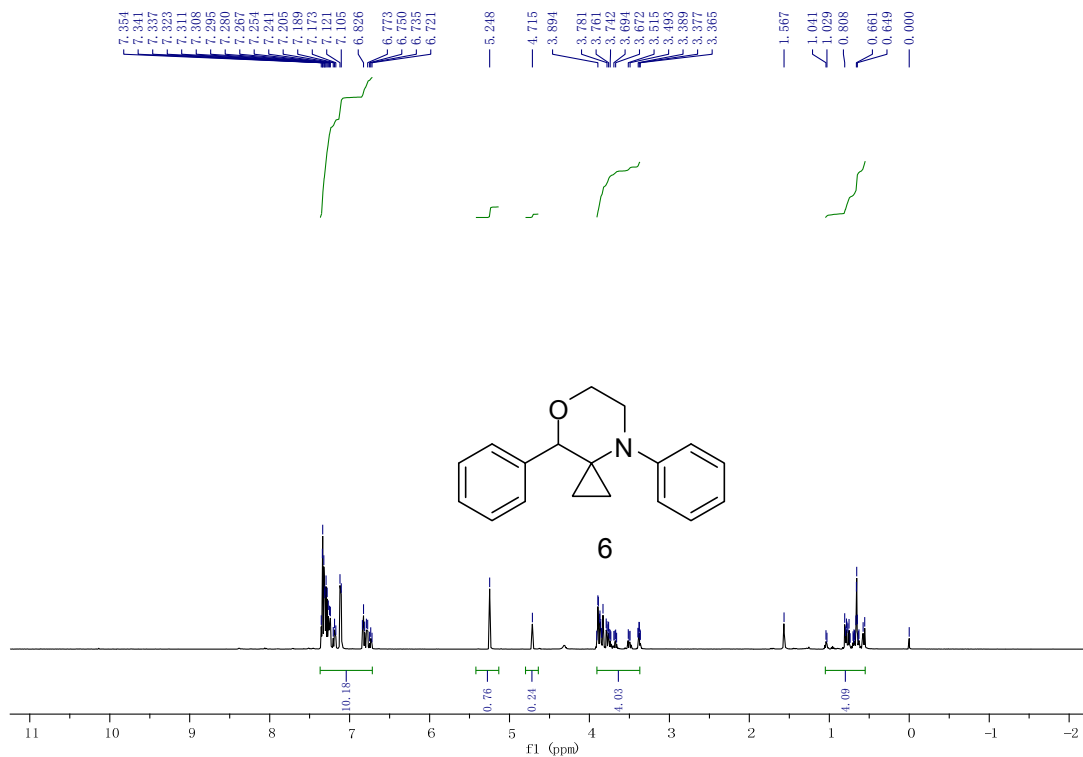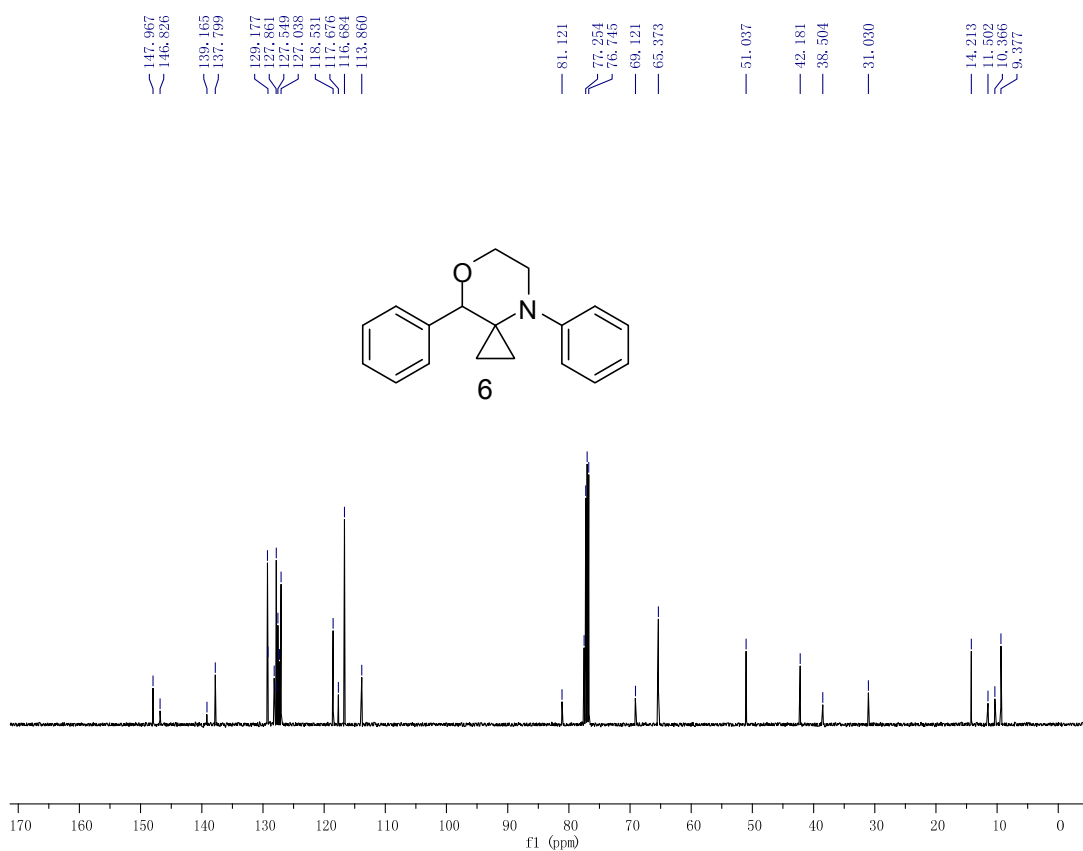

Supplement: c2cc35235d.pdf [file c2cc35235d.pdf]
